# Supplementary material
Source: PubMed Central journal article supplement (PMC6553483)
Supplement: NIHMS1530452-supplement-2.pdf [file NIHMS1530452-supplement-2.pdf]

## Reduced Prefrontal Synaptic Connectivity and Disturbed Oscillatory Population Dynamics in the CNTNAP2 Model of Autism

### Graphical Abstract

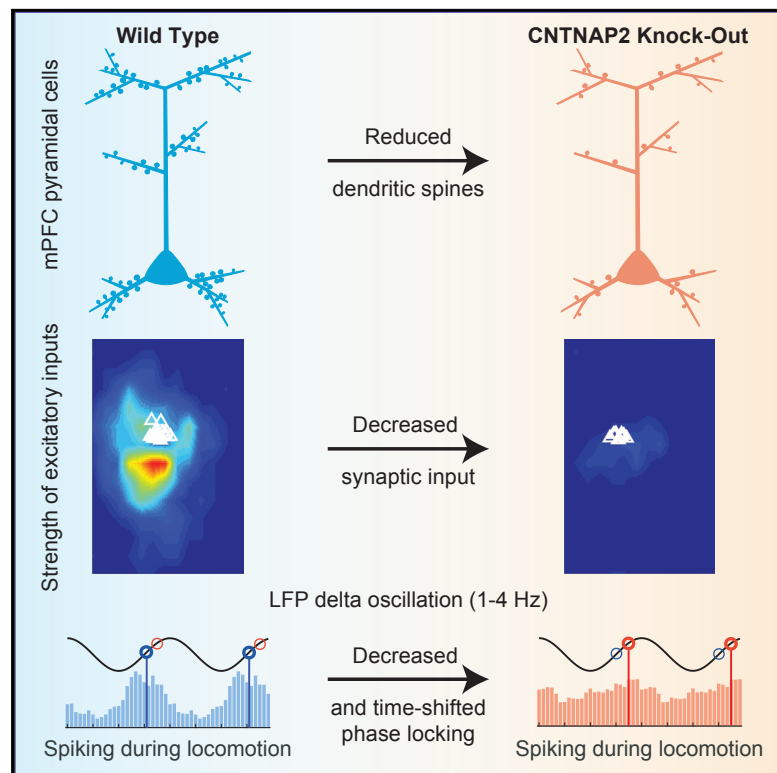

### Authors

Maria T. Lazaro, Jiannis Taxidis, Tristan Shuman, ..., Xiangmin Xu, Daniel H. Geschwind, Peyman Golshani

### Correspondence

dhg@mednet.ucla.edu (D.H.G.), pggolshani@mednet.ucla.edu (P.G.)

### In Brief

Lazaro et al. demonstrate a decrease in synaptic inputs onto mPFC L2/3 pyramidal neurons of *Cntnap2* KO mice, concurrent with reduced spines and synapses. These lead to perturbed network activity, with mPFC cells exhibiting reduced phase locking and altered preferred phases to slow LFP oscillations, which may underlie autism-related phenotypes.

### Highlights

- Synaptic inputs onto mPFC L2/3 pyramidal neurons are reduced in *Cntnap2* KO mice
- The frequency and amplitude of mEPSCs are reduced in the mPFC of *Cntnap2* KO neurons
- Decreased density of dendritic excitatory and inhibitory synapses in *Cntnap2* KO mice
- Phase-modulated spiking to slow LFP oscillations is altered in *Cntnap2* KO units

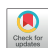

# Reduced Prefrontal Synaptic Connectivity and Disturbed Oscillatory Population Dynamics in the CNTNAP2 Model of Autism

Maria T. Lazaro,<sup>1,2,3,13</sup> Jiannis Taxis, <sup>3,4,13</sup> Tristan Shuman,<sup>3,4,5</sup> Iris Bachmutsky,<sup>3</sup> Taruna Ikrar,<sup>6</sup> Rommel Santos,<sup>6</sup> G. Mark Marcello,<sup>7</sup> Apoorva Mylavarapu,<sup>3</sup> Swasty Chandra,<sup>3</sup> Allison Foreman,<sup>3</sup> Rachna Goli,<sup>3</sup> Duy Tran,<sup>3</sup> Nikhil Sharma,<sup>3</sup> Michelle Azhdam,<sup>3</sup> Hongmei Dong,<sup>3</sup> Katrina Y. Choe,<sup>2</sup> Olga Peñagarikano,<sup>8,9</sup> Sotiris C. Masmanidis,<sup>4</sup> Bence Rácz,<sup>7</sup> Xiangmin Xu,<sup>6</sup> Daniel H. Geschwind,<sup>2,3,10,11,\*</sup> and Peyman Golshani<sup>3,4,11,12,14,\*</sup>

<sup>1</sup>Interdepartmental Program for Neuroscience, UCLA, Los Angeles, CA, USA

<sup>2</sup>Center for Neurobehavioral Genetics, Semel Institute, UCLA, Los Angeles, CA, USA

<sup>3</sup>Department of Neurology, David Geffen School of Medicine, UCLA, Los Angeles, CA, USA

<sup>4</sup>Integrative Center for Learning and Memory, Brain Research Institute, UCLA, Los Angeles, CA, USA

<sup>5</sup>Department of Neuroscience, Icahn School of Medicine at Mount Sinai, New York, NY, USA

<sup>6</sup>Department of Anatomy and Neurobiology, UC Irvine, Irvine, CA, USA

<sup>7</sup>Department of Anatomy and Histology, University of Veterinary Medicine, Budapest, Hungary

<sup>8</sup>Department of Pharmacology, School of Medicine, University of the Basque Country (UPV/EHU), Vizcaya, Spain

<sup>9</sup>Centro de Investigación Biomédica en Red en Salud Mental (CIBERSAM), Madrid, Spain

<sup>10</sup>Center for Autism Research and Treatment, Semel Institute, UCLA, Los Angeles, CA, USA

<sup>11</sup>Intellectual Development and Disabilities Research Center, UCLA, Los Angeles, CA, USA

<sup>12</sup>West Los Angeles VA Medical Center, Los Angeles, CA

<sup>13</sup>These authors contributed equally

<sup>14</sup>Lead Contact

\*Correspondence: [dhg@mednet.ucla.edu](mailto:dhg@mednet.ucla.edu) (D.H.G.), [pgolshani@mednet.ucla.edu](mailto:pgolshani@mednet.ucla.edu) (P.G.)

<https://doi.org/10.1016/j.celrep.2019.05.006>

## SUMMARY

Loss-of-function mutations in CNTNAP2 cause a syndromic form of autism spectrum disorder in humans and produce social deficits, repetitive behaviors, and seizures in mice. However, the functional effects of these mutations at cellular and circuit levels remain elusive. Using laser-scanning photostimulation, whole-cell recordings, and electron microscopy, we found a dramatic decrease in excitatory and inhibitory synaptic inputs onto L2/3 pyramidal neurons of the medial prefrontal cortex (mPFC) of *Cntnap2* knockout (KO) mice, concurrent with reduced spines and synapses, despite normal dendritic complexity and intrinsic excitability. Moreover, recording of mPFC local field potentials (LFPs) and unit spiking *in vivo* revealed increased activity in inhibitory neurons, reduced phase-locking to delta and theta oscillations, and delayed phase preference during locomotion. Excitatory neurons showed similar phase modulation changes at delta frequencies. Finally, pairwise correlations increased during immobility in KO mice. Thus, reduced synaptic inputs can yield perturbed temporal coordination of neuronal firing in cortical ensembles.

## INTRODUCTION

Autism spectrum disorder (ASD) is characterized by deficits in social communication and repetitive or restrictive behaviors

(American Psychiatric Association, 2013). Genetic studies have revealed that the etiology of ASD is very heterogeneous, involving hundreds of genes (O’Roak et al., 2012; Sanders et al., 2012; Chen et al., 2015; Krishnan et al., 2016), a significant proportion of which appear as rare recessive or *de novo* dominant mutations (Geschwind, 2011; lossifov et al., 2014; Gilman et al., 2011; Leppa et al., 2016). One highly penetrant syndromic form of ASD is caused by loss-of-function mutations in the CNTNAP2 gene (Strauss et al., 2006), and CNTNAP2 polymorphisms have been associated with increased risk of ASD and other conditions (Poot et al., 2010; Scott-Van Zeeland et al., 2010; Arking et al., 2008).

CNTNAP2 encodes for contactin-associated protein-like 2 (Caspr2), a protein of the neurexin superfamily that has diverse cellular and circuit functions (Strauss et al., 2006; Poliak et al., 1999, 2001, 2003; Gdalyahu et al., 2015; Varea et al., 2015; Alarcón et al., 2008; Peñagarikano et al., 2011; Jurgensen and Castillo, 2015). Mice lacking the *Cntnap2* gene recapitulate core behavioral deficits of ASD, including socialization and communication impairments, repetitive behaviors, and seizures (Peñagarikano et al., 2011). Recent *in vivo* evidence suggests that CNTNAP2 has a putative role in synapse formation and stabilization and that dendritic spine dynamics are affected in the *Cntnap2* knockout (KO) mice, with reduced stability in newly formed spines (Gdalyahu et al., 2015). In addition, loss of CNTNAP2 leads to synaptic alterations *in vitro*, with decreased inhibition and axonal excitability deficits in acute hippocampal slices (Anderson et al., 2012; Jurgensen and Castillo, 2015; Scott et al., 2019). These results suggest that CNTNAP2 mutations may be linked to abnormal behavior by altering synaptic neurotransmission, functional connectivity, and neuronal network

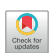

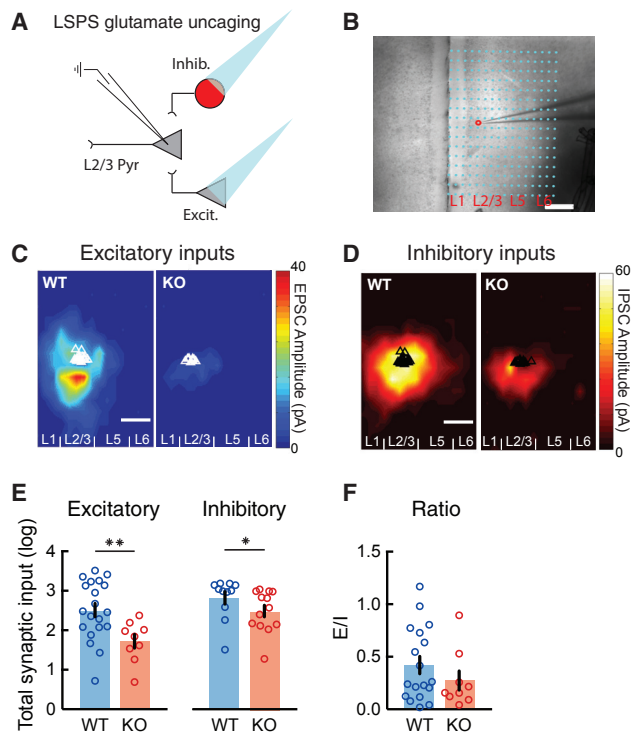

**Figure 1. Reduced Excitatory and Inhibitory Synaptic Inputs to L2/3 Pyramidal Neurons in the mPFC of *Cntnap2* KO Mice**

(A) Schematic of laser-scanning photostimulation (LSPS) via glutamate uncaging paradigm, combined with whole-cell patch-clamp recordings of L2/3 pyramidal (Pyr) neurons in acute slices of the medial prefrontal cortex (mPFC). Patched neurons were clamped at  $-70$  or  $+5$  mV for the detection of local excitatory or inhibitory synaptic connections arising from photostimulated presynaptic glutamatergic (Excit.) and GABAergic (Inhib.) neurons.

(B) Example of an LSPS experiment in an mPFC slice, in which differential interference contrast imaging was used for tissue visualization. Photostimulation sites are superimposed (dots) and spaced within a  $100\text{-}\mu\text{m} \times 60\text{-}\mu\text{m}$  grid. The red circle indicates the location of the recorded glutamatergic neuron in L2/3, approached by the patch pipette.

(C and D) Group-averaged excitatory (C) and inhibitory (D) input maps of L2/3 excitatory neurons for WT ( $n = 20$  cells from 3 mice in C;  $n = 11$  cells from 3 mice in D) and KO ( $n = 9$  cells from 3 mice in C;  $n = 13$  cells from 3 mice in D) mice. Triangles indicate the location of individually recorded neurons.

(E) Average total synaptic excitatory and inhibitory input strength (log) measured for L2/3 excitatory cells depicting a robust decrease in the KO mice, compared to WT mice (WT: EPSC  $2.51 \pm 0.17$ ,  $n = 20$  cells; KO: EPSC  $1.72 \pm 0.15$ ,  $n = 13$  cells; WT: IPSC  $2.83 \pm 0.16$ ,  $n = 11$  cells; KO: IPSC  $2.49 \pm 0.15$ ,  $n = 13$  cells; EPSC:  $**p = 0.0051$ , IPSC:  $*p = 0.0218$ ; Wilcoxon test).

(F) Average ratios of total EPSCs over IPSCs from individual cells (WT:  $n = 17$  cells; KO:  $n = 8$  cells). There is no significant difference in E/I ratio between WT and KO ( $p = 0.8873$ ; unpaired t test). Scale bars:  $200\text{ }\mu\text{m}$ .

All errors bars indicate the SEM.

activity. However, the specific cellular and circuit mechanisms that lead to altered behavior in *Cntnap2* KO mice remain unclear.

Here, we examined the neurophysiological consequences of *Cntnap2* deletion in the mouse medial prefrontal cortex (mPFC), a brain region that is critically involved in social behavior (Yizhar et al., 2011; Grossmann, 2013) and notably affected in ASD (Voineagu et al., 2011; Redcay et al., 2013; Selimbeyoglu et al., 2017). mPFC cells can modulate social behavior, are

critical for cortico-cortical communication, and have been considered a critical hub for autism-related gene expression (Yizhar et al., 2011; de la Torre-Ubieta et al., 2016; Selimbeyoglu et al., 2017; Parikhshak et al., 2013). Using glutamate uncaging via laser-scanning photostimulation (LSPS) on layer 2/3 (L2/3) pyramidal neurons of the mPFC in combination with *in vitro* whole-cell patch-clamp recordings, we observed a reduction in both excitatory and inhibitory synaptic inputs onto excitatory neurons and decreased excitatory neurotransmission. Anatomical studies showed a concomitant decrease in dendritic spine and synapse densities. Using multichannel silicon microprobes to record *in vivo* local field potentials (LFPs) and activity from single neurons in the mPFC, we observed robust alterations in the phase locking of units to delta and theta oscillations during locomotion. These findings demonstrate that the loss of *Cntnap2* results in decreased excitatory drive onto pyramidal cells, which further leads to alterations in circuit-level synchronous activity in the mPFC. Therefore, mutations in *CNTNAP2* could be mechanistically linked to alterations in microcircuit connectivity and lead to abnormal population activity, providing a potential substrate for behavioral abnormalities in ASD.

## RESULTS

### Decreased Excitatory and Inhibitory Inputs in the mPFC of *Cntnap2* KO Mice

To test how the loss of *CNTNAP2* alters mPFC microcircuits, we used LSPS via glutamate uncaging to map and quantify local excitatory and inhibitory cortical inputs onto L2/3 mPFC pyramidal neurons. By voltage clamping patched pyramidal neurons at  $-70$  and  $+5$  mV, we recorded excitatory and inhibitory synaptic inputs, respectively, while uncaging glutamate and activating small clusters of surrounding neurons (Figures 1A, 1B, and S1). We observed that, similar to wild-type (WT), L2/3 pyramidal neurons in KO mice received most of their excitatory and inhibitory synaptic inputs from L2/3 and L5 in the mPFC (Figures 1C and 1D). However, L2/3 excitatory neurons in KO mice displayed a dramatic reduction in both excitatory and inhibitory local synaptic inputs compared to WT (Figures 1C–1E), while the balance of excitation to inhibition (E/I) in individual neurons was not significantly altered (Figure 1F). This reduction was not due to lower neuronal responsiveness to glutamate uncaging in KO mice, since both mouse groups showed equivalent responses to uncaging onto perisomatic regions (Figure S1).

Our input mapping findings could also be associated with alterations in the intrinsic excitability of cortical neurons. *Caspr2* has a known role in the clustering of potassium channels in the juxtaparanodes of axons, which are important for the propagation of action potentials (Poliak et al., 1999, 2001, 2003). To examine whether the loss of *Cntnap2* resulted in altered excitability and intrinsic properties in mPFC, we performed whole-cell current-clamp recordings on mPFC L2/3 pyramidal and parvalbumin-positive (PV<sup>+</sup>) inhibitory neurons (recorded in *Cntnap2*-PV-Cre  $\times$  Ai9 animals) in KO and WT controls. We focused on PV<sup>+</sup> interneurons, as these cells provide powerful perisomatic inhibition to cortical pyramidal neurons, and their dysfunction has been implicated in autism-associated deficits resulting from the loss of *Cntnap2* (Scott et al., 2019;

Peñagarikano et al., 2011). Input-output curves, showing the average number of action potentials elicited by increasing current injections in pyramidal and PV<sup>+</sup> neurons, revealed no significant alterations in the action potential firing rate between the two groups (Figure S2). Action potential threshold, amplitude, half-width, afterhyperpolarization (AHP) potential, or time from peak to AHP were also not significantly different between WT and KO. The same was observed for resting membrane potential, input resistance, cell membrane capacitance, and membrane time constant (Table S1).

These results indicate that the loss of *Cntnap2* does not affect the intrinsic excitability of L2/3 neurons of the mPFC, but leads to a robust reduction of local excitatory and inhibitory inputs onto these cells.

### Decreased Excitatory Neurotransmission in Pyramidal Neurons of *Cntnap2* KO Mice

To investigate the specific cellular processes that lead to reduced synaptic responses in KO mice, we performed whole-cell patch-clamp recordings of miniature excitatory and inhibitory postsynaptic currents (mEPSCs and mIPSCs, respectively) in mPFC L2/3 neurons. We measured mEPSC and mIPSC amplitude, frequency, and kinetics, as changes in amplitude are a reliable measure of the number of receptors at synapses (quantal size), while frequency correlates with the number of contacts or probability of release (Greer et al., 2010). In agreement with our LSPS findings, we observed a 2-fold decrease in the frequency of mEPSCs (Figures 2A and 2B) and a significant decrease in the average amplitude of mEPSCs in *Cntnap2* KO pyramidal neurons (Figure 2C). We observed no statistically significant alterations in the frequency, amplitude, or kinetics of mIPSCs (Figures 2D–2F), despite the marked reduction in inhibition found with LSPS cortical input mapping (Figures 1D and 1E). This could reflect compensatory changes between synapse number and release probability or altered distribution of proximal and distal inhibitory inputs. In addition, we examined miniature postsynaptic currents in PV<sup>+</sup> interneurons and found no significant differences in mEPSCs or mIPSCs (Figures S3A–S3F).

We then asked whether the observed decrease in mEPSC frequency on pyramidal neurons could be caused by a disruption in the probability of synaptic vesicle release (Toni et al., 1999; Sorra et al., 1998; Calverley and Jones, 1990). We tested this by stimulating long-range axonal projections to mPFC in slices and measuring evoked excitatory currents elicited in L2/3 pyramidal cells (Figure 2G). We observed reduced evoked EPSC amplitudes (Figure 2H) and significantly increased EPSC latencies (Figures S3G and S3H) in KO mice compared to controls, corroborating our previous findings of reduced excitatory neurotransmission. However, we found no significant differences in paired-pulse ratios of evoked currents between WT and KO mice (Figures 2I and 2J), indicating similar excitatory neurotransmitter release probabilities.

Finally, we tested whether KO mice had altered, immature, or silent synapses, characterized by the decreased ratio of  $\alpha$ -amino-3-hydroxyl-5-methyl-4-isoxazole-propionate to *N*-methyl-D-aspartate (AMPA/NMDA) receptors (Toni et al., 1999; Calverley and Jones, 1990; Dani et al., 2005; Gibson et al., 2008). We recorded evoked AMPA and NMDA currents in the

presence of the GABA<sub>A</sub> receptor blocker, picrotoxin, by holding the cells at  $-70$  and  $+40$  mV, respectively, in voltage clamp. We found no significant difference in the AMPA:NMDA ratios when comparing WT and KO mice (Figures 2K and 2L), indicating that KO mice do not have more immature or silent synapses.

These results indicate a reduction in the frequency and amplitude of excitatory drive onto single pyramidal cells, which cannot be explained by alterations in single synapse maturity or neurotransmitter vesicle release.

### Decreased Dendritic Spine Density in *Cntnap2* KO Mice

We next asked whether the decrease in excitatory neurotransmission was caused by a reduction in the total number of synaptic inputs, either through decreased dendritic branching or decreased spine density. We performed 3D anatomical reconstructions of L2/3 pyramidal neurons by filling cells with biocytin during *in vitro* slice recording experiments and imaged them with confocal microscopy. Sholl analysis did not reveal significant changes in total dendritic length, total number of dendritic branches, or dendritic complexity (Figures 3A and 3B), suggesting that L2/3 pyramidal neurons in *Cntnap2* KO mice have normal dendritic arborization. In addition, the density of neuronal cell bodies in L2/3 and the density of immunolabeled PV<sup>+</sup> neurons in the prelimbic cortex was similar in *Cntnap2* KO mice and controls (Figures S4A and S4B).

To determine whether *Cntnap2* KO neurons display a decrease in dendritic spine density, we crossed homozygous *Cntnap2* KO (or WT) mice with Thy1-GFP mice, which express GFP in a subset of cortical pyramidal neurons, including sparsely labeled L2/3 mPFC pyramidal cells. The quantification of dendritic spines in these cells revealed that L2/3 pyramidal neurons in KO mice show a significant decrease in both basal and apical dendritic spine density (Figures 3C and 3D), which may underlie the reduction in functional synaptic inputs that we observed in our electrophysiology experiments.

To further validate this hypothesis, we used electron microscopy to examine L2/3 mPFC dendritic spines and synaptic contacts in WT ( $n = 3$ ) and *Cntnap2* KO mice ( $n = 3$ ) (Figure 3E). Consistent with our previous findings, we observed a significant (~25%) reduction in the number of both asymmetric (excitatory) and symmetric (inhibitory) synapses in KO mice (Figure 3F). Furthermore, we found no significant changes in spine area or synapse length in the KO mice (Figure 3G). However, *Cntnap2* KO mice had a markedly reduced density of multisynapse boutons (MSBs) (Figure 3H), a marker of synaptogenesis (Toni et al., 1999). We also found an increase in perforated synapses in these mice (Figure 3I), which are associated with increased synaptic turnover (Calverley and Jones, 1990; Sorra et al., 1998), supporting previous reports of increased dendritic spine turnover in *Cntnap2* KO mice (Gdalyahu et al., 2015).

To determine how the loss of CNTNAP2 alters synaptic inputs to the distal apical tufts of excitatory neurons, we also counted asymmetric (putative excitatory) and symmetric (putative inhibitory) synapses in L1. *Cntnap2* KO mice exhibited significantly decreased asymmetric and symmetric synapse numbers in L1 compared to controls, suggesting impairments in distal dendritic excitation and inhibition in these animals (Figures S4C and S4D).



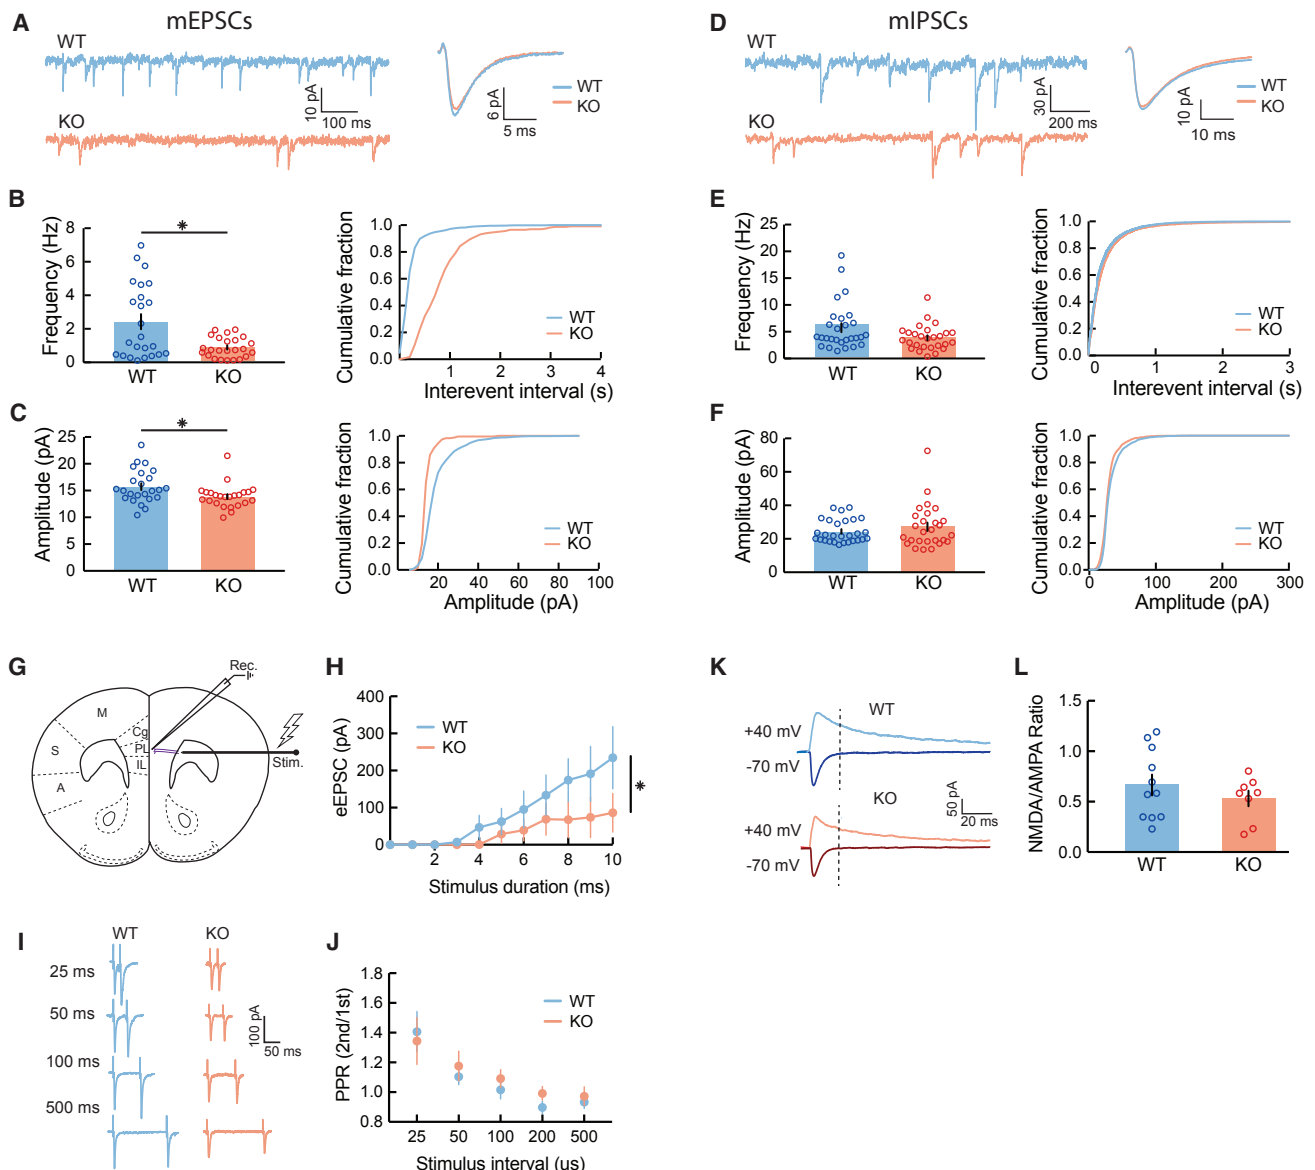

**Figure 2. Reduced mEPSC Frequency and Long-Range Excitatory Inputs in Cntnap2 KO Pyramidal Neurons**

(A) Representative traces from recorded mEPSCs in Cntnap2 WT and KO pyramidal cells, voltage clamped at  $-70$  mV, with corresponding average unitary events. (B) Frequency of mEPSCs (WT:  $2.42 \pm 0.45$  Hz,  $n = 24$  cells, 6 mice; KO:  $0.89 \pm 0.12$  Hz,  $n = 24$  cells, 5 mice; Wilcoxon test,  $*p = 0.0410$ ) is decreased in KO mice. (C) Amplitude of mEPSCs (WT:  $15.73 \pm 0.63$  pA,  $n = 24$ , 6 mice; KO:  $13.88 \pm 0.45$  pA,  $n = 24$  cells, 5 mice; Wilcoxon test,  $*p = 0.0172$ ) is decreased in KO mice. (D–F) Same as (A)–(C), but for mIPSCs. There is no significant decrease in frequency (WT:  $5.76 \pm 0.83$  Hz,  $n = 28$  cells, 8 mice; KO:  $3.87 \pm 0.45$  Hz,  $n = 27$  cells, 4 mice;  $p = 0.1327$ ; Wilcoxon test) or amplitude of mIPSCs (WT:  $24.43 \pm 1.30$  pA,  $n = 28$  cells, 8 mice; KO:  $27.21 \pm 2.48$  pA,  $n = 27$  cells, 4 mice;  $p = 0.8740$ , Wilcoxon test) in KO mice compared to WT mice. (G) A monopolar tungsten electrode was used to stimulate long-range axons (purple), which extend from the anterior forceps of the corpus callosum and project onto a patched excitatory neuron in L2/3 mPFC. (H) Input-output curves of excitatory responses resulting from a range of increasing stimulus intensities in Cntnap2 WT and KO mice (WT:  $n = 7$  cells,  $n = 6$  mice; KO:  $n = 9$  cells,  $n = 5$  mice;  $*p < 0.0001$ , 2-way ANOVA). (I) Representative current responses from paired pulses given at various interstimulus intervals (ISIs) in WT and KO mice. (J) Ratio of second to first evoked synaptic response to paired-pulse stimulation at increasing ISIs suggests no significant deficits in the probability of synaptic vesicle release in Cntnap2 KO mice (WT:  $n = 10$  cells,  $n = 6$  mice; KO:  $n = 8$  cells,  $n = 5$  mice;  $p = 0.8926$ , 2-way ANOVA). (K) Evoked AMPA (cells voltage clamped at  $-70$  mV) and NMDA (cells voltage clamped at  $+40$  mV) currents in WT and KO mice. Stimulus artifact was blanked for clarity. Dashed line indicates point where NMDA current amplitudes were measured, immediately after AMPA current decay. (L) AMPA to NMDA ratios of Cntnap2 KO mice were not significantly altered, compared to WT mice, suggesting no significant changes in synaptic maturity (WT:  $0.67 \pm 0.10$ ,  $n = 11$  cells, 6 mice; KO:  $0.53 \pm 0.08$ ,  $n = 8$  cells, 5 mice;  $p = 0.3471$ , unpaired t test). All errors bars indicate the SEM.

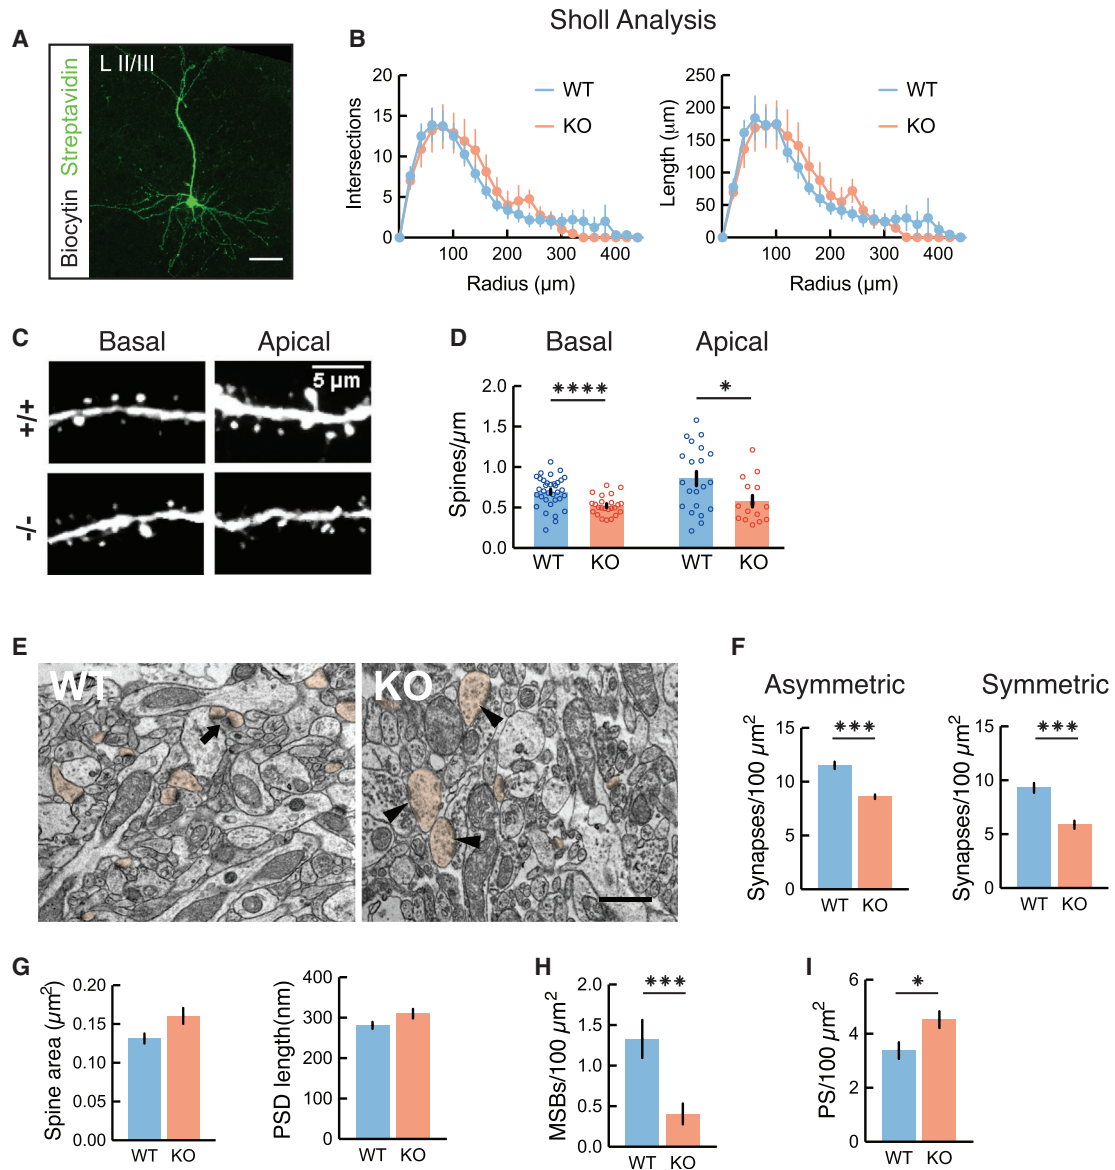

These findings indicate that the loss of *Cntnap2* leads to significant defects in both inhibitory and excitatory synaptic density, as well as alterations in markers of synapse plasticity and stability.

### Altered *In Vivo* Network Activity in mPFC of *Cntnap2* KO Mice

How does the observed decrease in cortical inputs onto L2/3 pyramidal neurons of *Cntnap2* KO mice affect network activity *in vivo*? Such a robust decrease in functional synapses could affect the precise temporal coordination of neuronal firing during cortical network oscillations, which is critically dependent on the balance between excitation and inhibition (Sorra et al., 1998; Golomb and Hansel, 2000; Dani et al., 2005; Gibson et al., 2008).

To test this hypothesis, we recorded *in vivo* LFPs and single unit activity in the mPFC of KO and WT mice using multichannel silicon microprobes (Shobe et al., 2015) (Figures 4A and 4B). Head-fixed mice were free to rest or run on a spherical treadmill during the recordings (Polack et al., 2013), and locomotion was monitored. Both mouse groups exhibited similar locomotion characteristics, with a small but non-significant tendency for KO mice to have sparser but longer locomotion bouts (Figures S5A–S5F), in support of previous observations of hyperactivity in these animals (Peñagarikano et al., 2011). Activity during concatenated locomotion and immobility segments was analyzed separately (Figure 4A).

We recorded 249 single units from 8 WT mice and 145 units from 5 KO mice, which were clustered into wide-spiking (WS), putative excitatory units and narrow-spiking (NS), putative interneurons (Figures 4B and 4C). Firing rates of WS neurons had similar distributions between the WT and KO groups (Figures 4D, S5G, and S5H), but NS units from KO mice fired at a significantly higher rate (and consequently with lower inter-spike intervals), compared to the WT group, during both locomotion and immobility states (Figures 4E, S5G, and S5H). No differences between the two groups were observed in spiking variability or burst index in either unit type during either state (Figures S5G and S5H), suggesting unaltered intrinsic spiking characteristics in units of KO animals.

Since a decrease in synapse number could affect the coordinated synaptic activity that is thought to shape the LFP signal, particularly at low frequencies (Buzsáki et al., 2012), we first tested whether the power of low-frequency oscillations was altered in KO mice. We found no significant differences in the average power of the LFP between KO and WT mice in delta (1–4 Hz) or theta (5–11 Hz) oscillations, or even higher frequencies (beta 12–30 Hz, slow gamma 30–55 Hz, or high gamma 80–110 Hz), during either locomotion or immobility (Figure 4F), suggesting no major alterations in mPFC oscillatory activity on a broad neuronal population level.

Different neuronal populations are typically recruited to fire selectively at specific phases of ongoing oscillations, creating a dynamic circuit pattern (Klausberger and Somogyi, 2008). To assess how the observed synaptic alterations in KO mice reflect on the spiking modulation of individual units during LFP oscillations, we examined the preferred firing phase of each unit and its phase-locking strength to that phase, focusing again on delta and theta LFP oscillations during locomotion (Figures 5A and 5B)

and immobility separately. We found a significant decrease in the strength of phase locking of WS units to delta oscillations and NS units to delta and theta oscillations in KO animals during locomotion, combined with significant shifts in both unit types to later phases in the respective oscillatory cycles (Figure 5C). Extending this analysis over the faster LFP oscillation rhythms mentioned above yielded fewer units that were significantly locked to such frequencies, particularly in KO animals (Figure S6). Notably, we found a decrease in phase locking to beta oscillations in NS units of KO mice, but over a small sample of phase-locked units.

The observed reduction in phase locking in KO animals extended during immobility (Figure 5D), with significant reductions observed mainly for NS units in theta and gamma frequency ranges (Figure S6). During theta oscillations, we found a significant shift to later phases in WS units (Figure 5D). Finally, the number of significantly phase-locked units per animal to each frequency was on average comparable in both WT and KO groups (Table S2).

Decreased phase locking of individual units to LFP oscillations suggests a reduction in coordinated population activity during both motion and immobility in *Cntnap2* KO animals. To test this, we compared correlations between the firing rates of all pairs of units in WT versus KO mice, during either locomotion or immobility, separately for WS-WS, NS-NS, and WS-NS pairs in each mouse (Figures 5E and 5F). Only units with adequate spiking (>200 spikes in each condition) were considered. Correlations between WS units exhibited a small but significant reduction in KO mice during locomotion and immobility. NS units exhibited no significant difference in locomotion, but they were significantly more correlated in KO animals during immobility, leading to increased WS-NS correlations as well. This finding was not affected by the firing rate binning since it was reproduced with firing rate time bins spanning from 500 (2 Hz, delta frequency; Figures 5E and 5F) down to 25 ms (40 Hz, slow gamma; Figure S7). Again, comparable numbers of units from each mouse group were included in each case (Table S2). Therefore, despite their reduction in phase locking to particular LFP oscillations, NS unit pairs remained more strongly correlated in immobile KO animals, despite a prominent desynchronization of WS units in each condition.

These results indicate a disrupted mPFC network in *Cntnap2* KO mice, in which both excitatory and inhibitory neurons have less precise firing patterns that are also shifted relative to network activity and yield less coherent network dynamics. These alterations may lead to severely altered mPFC processing in *Cntnap2* KO mice, potentially contributing to altered brain function and the previously described behavioral deficits observed in these mice.

## DISCUSSION

Here, we find that the loss of *Cntnap2*, which causes a syndromic form of autism in humans, leads to reduced synaptic inputs onto L2/3 pyramidal neurons in the mPFC. LSPS mapping revealed a dramatic reduction of both excitatory and inhibitory inputs in this region, and mEPSCs occurred at a lower frequency in neurons. These findings suggest a decrease in the total number of excitatory synapses, which was confirmed with confocal microscopy as a decrease in spine density and the decrease in

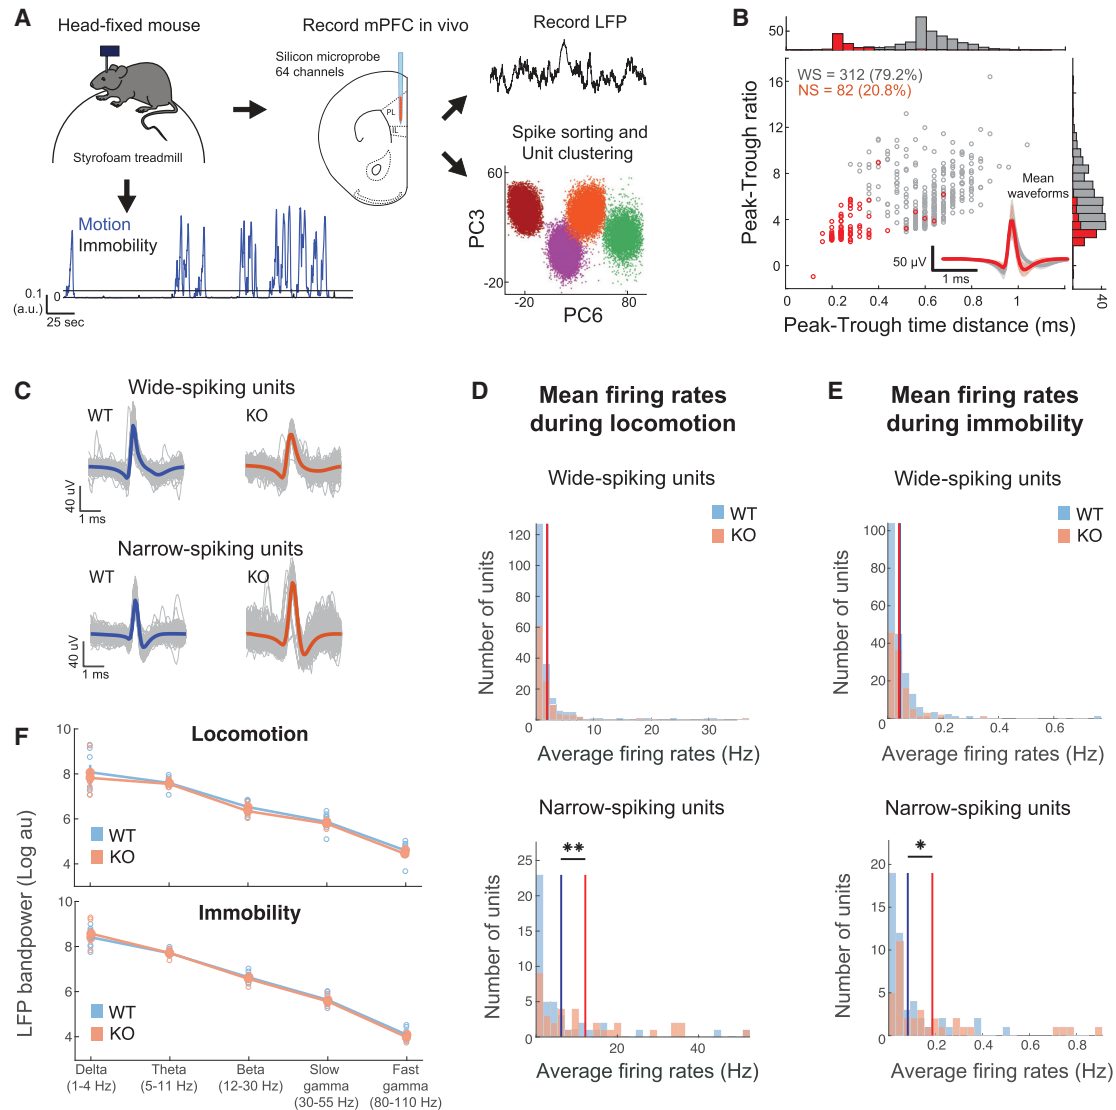

**Figure 4. Increased Activity in *In Vivo*-Recorded Narrow-Spiking Units of *Cntnap2* KO Mice, but Normal LFP Oscillations**

(A) Schematic of *in vivo* recordings and subsequent analysis of electrophysiological data. Mice were head fixed while free to run on a spherical treadmill. Extracellular signals were recorded from all layers of the mPFC of both WT ( $n = 8$ ) and KO mice ( $n = 5$ ) using multi-electrode silicon microprobes. Spikes were sorted into tentative single units (see [Method Details](#)). Motion on the treadmill was also recorded, and traces were separated into locomotion and immobility segments.

(B) Distribution and corresponding histograms of mean waveform peak-to-trough ratios versus peak-to-trough time distances for the two unit clusters consisting of WS and NS units. The inset depicts the average waveforms from all units in the two clusters.

(C) Unit spike waveforms averaged over all individual spikes (gray) from two example units from a WT mouse and a KO mouse.

(D and E) Distributions of average firing rates during locomotion (D) and immobility (E) for all WS and NS units in WT versus KO mice. Solid lines indicate the mean rates over all cells in the two groups. No significant difference for WS units. \*\* $p < 0.01$ ; two-sample t test; Bonferroni corrected.

(F) Mean LFP bandpower during motion (top) and immobility (bottom) in WT and *Cntnap2* KO mice, calculated from a single representative channel per mouse, located in the prelimbic mPFC. No significant differences were observed ( $p > 0.05$ , Wilcoxon test).

All errors bars indicate the SEM.

both excitatory and inhibitory synapses seen with electron microscopy. *In vivo*, these changes were associated with decreased phase-locking strength and shifted phase preference of putative excitatory neurons to delta oscillations and of inhibitory neurons to delta and theta oscillations during locomotion. We conclude that the loss of CNTNAP2 has a profound impact

on synaptic connectivity and population dynamics of excitatory and inhibitory neurons in the mPFC.

The observed reduction in functional synaptic connectivity and in the density of synapses in the mPFC of *Cntnap2* KO animals is consistent with recent studies showing reduced local and long-range functional connectivity in the prefrontal cortex of these



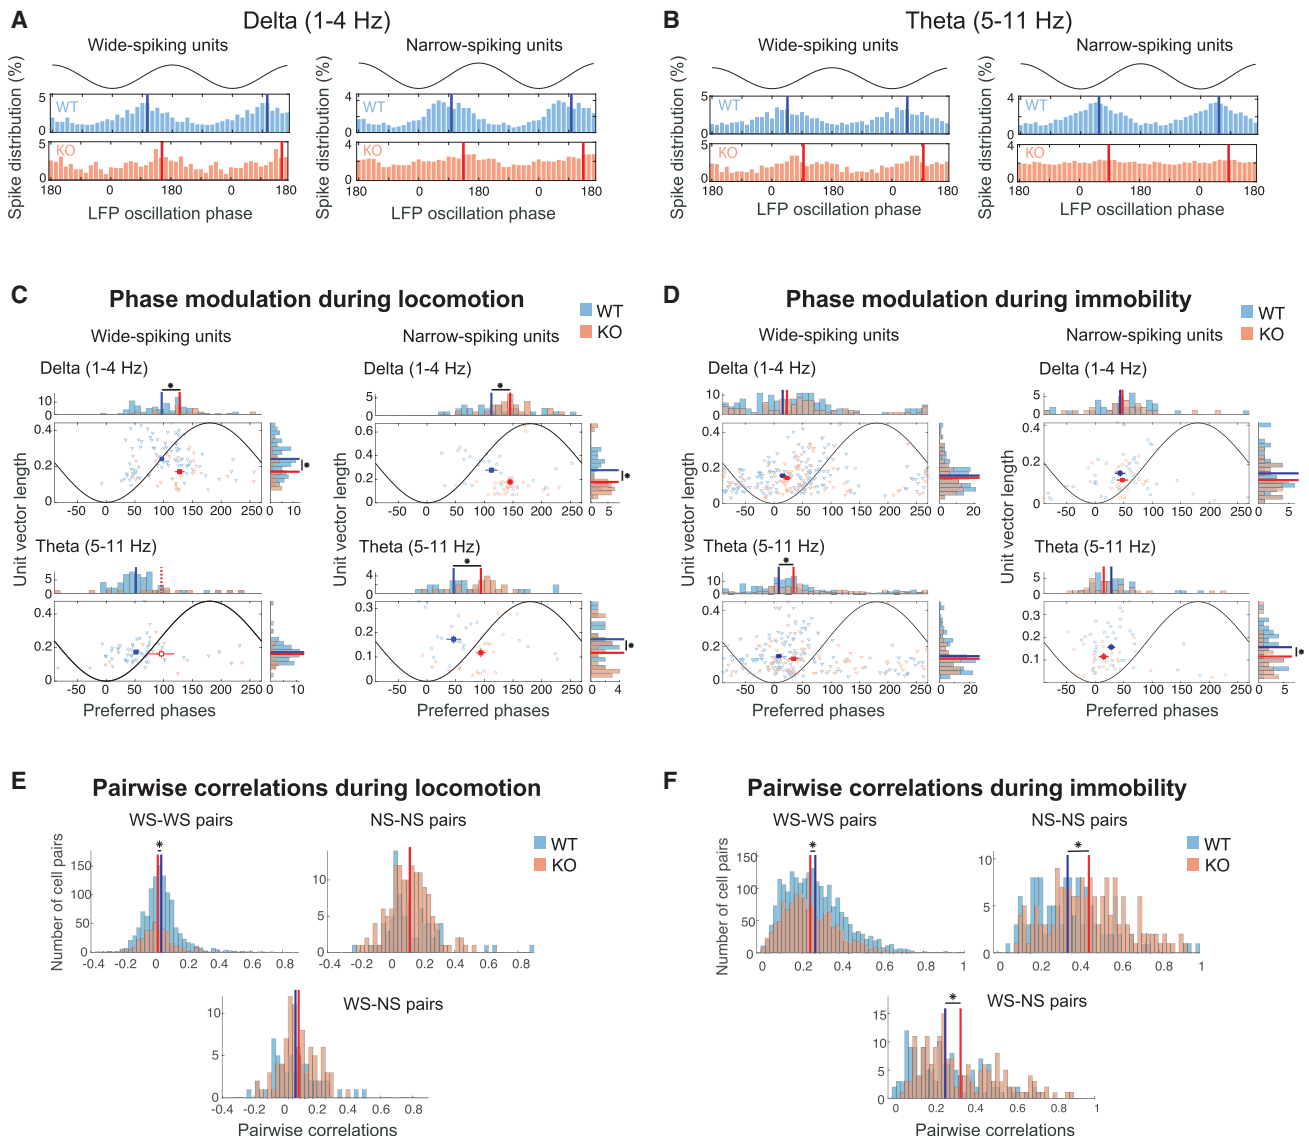

**Figure 5. Altered Phase Locking to Low-Frequency LFP Oscillations in *In Vivo*-Recorded Single Units of *Cntnap2* KO Mice**

(A) Left: LFP delta frequency phase histograms of spikes (% over all spikes) of two WS units. Two cycles of the oscillation are shown together with a representation of the LFP oscillation for clarity. Solid lines indicate the mean (preferred) phase of each unit. Right: Same as the left, but for two example NS units.

(B) Similar to (A) for theta frequency phase distributions.

(C) Distributions and corresponding histograms of phase-locking strength (mean vector length) versus preferred phases of pooled WS units (left) or NS units (right) from WT and KO mice to delta (top) and theta (bottom) LFP oscillations during locomotion. Only significantly phase-locked units with sufficient spiking are included (see [Method Details](#)). Filled rectangles and solid lines depict the mean  $\pm$  SE of the distributions and histograms, respectively (circular mean for phase distributions), for the two mouse groups. All of the distributions were significantly non-uniform ( $p < 0.05$ ; Rayleigh test for non-uniformity; Bonferroni corrected over mouse groups), except for the theta frequency distribution of KO units (indicated by open rectangle and dashed lines accordingly). Asterisks indicate significant differences either in mean vector length ( $p < 0.05$ ; t test if both distributions are normally distributed according to the Lilliefors test of normality with 5% significance level, or Wilcoxon test otherwise) or in mean preferred phase accordingly ( $p < 0.05$ ; parametric Watson-Williams test).

(D) Same as (C) for immobility segments.

(E and F) Correlation coefficient distributions between pairs of wide-spiking units (left), narrow-spiking units (right), and wide-narrow spiking unit pairs (bottom), over all corresponding WT (blue) and KO (red) unit pairs in each mouse. Firing rates were computed during locomotion (E) or immobility segments (F) over 500-ms-long time bins. Lines indicate the means of corresponding distributions. \* $p < 0.05$ , Wilcoxon test, Bonferroni corrected over the three unit-type combinations. All errors bars indicate the SEM.

mice (Liska et al., 2018), as well as work in somatosensory cortex, showing reductions in both excitatory and inhibitory input (Antoine et al., 2019). Moreover, work in dissociated neuronal cultures

showed decreased mEPSC and mIPSC frequency after RNAi knockdown of CNTNAP2, which was linked to decreased dendritic arbor complexity and decreased spine head size (Anderson et al.,

2012). While in general agreement with our findings, we found no changes in dendritic arborizations in the intact mPFC, despite a clear decrease in spine density. In addition, we found no significant changes in spine size or synapse length as assessed by electron microscopy in L2/3 of the mPFC. These inconsistencies between our findings and previous reports, specifically regarding dendritic morphology and spines, may arise from inherent differences between cultured neurons and *in vivo* preparations.

Our observed decrease in multisynapse boutons (MSBs) and increase in perforated postsynaptic densities (PSDs) further supports the notion that CNTNAP2 may have a complex role at the synaptic cleft. Since both MSBs and perforated PSDs are markers of well-developed synapses, this could also indicate that the loss of Cntnap2 disrupts synapse maturation dynamics via both pre- and postsynaptic mechanisms (Toni et al., 1999; Fiala et al., 2002; Nikonenko et al., 2002; Ganeshina et al., 2004; Geinisman, 1993). Accordingly, recent work in cultured cortical neurons from KO mice reported a decrease in spine density and in localization of the AMPA-subtype glutamate receptor GluA1 in the spines of Cntnap2 KO neurons (Varea et al., 2015), which is consistent with the small decrease in mEPSC amplitude that we observed. This is also concurrent with recent work, showing that Cntnap2 KO mice have reduced AMPA receptor expression and transmission *in vivo* (Kim et al., 2019). Our results are also in line with our previous work, reporting increased spine elimination and decreased spine density in apical dendrites of L5 neurons in the somatosensory cortex of Cntnap2 KO mice (Gdalyahu et al., 2015). Therefore, the effects of CNTNAP2 loss on spine density may generalize as decreased spine stability throughout the cortex.

Our observed lack of changes in intrinsic excitability of L2/3 pyramidal neurons or PV<sup>+</sup> neurons appears surprising, given that Cntnap2 is important for potassium channel localization in axons (Poliak et al., 2003). Nonetheless, it is likely that Cntnap2 loss affects neurons in a cell type- and projection-specific manner, as supported by recent reports of decreased input resistance and intrinsic excitability of L5 subcortical projecting neurons of the mPFC (Brumback et al., 2018).

Such alterations in synaptic physiology and neurotransmission seem to be a common theme among mouse models of neurodevelopmental disorders. Loss-of-function mutations in Shank3, MECP2, and Ube3a (modeling Phelan-McDermid, Rett, and Angelman syndromes, respectively) result in decreased spine density and excitatory neurotransmission in the cortex (Dani et al., 2005; Belichenko et al., 2009; Wallace et al., 2012; Zhou et al., 2016). Moreover, spine maturation is impaired in fragile X model mice (Cruz-Martín et al., 2010), similar to what we find in Cntnap2 KO, and cortical inhibitory neurotransmission is similarly compromised in a number of these disorders (Gibson et al., 2008; Curia et al., 2009; Cea-Del Rio and Huntsman, 2014; Banerjee et al., 2016). This posits the notion that increasing or modulating excitatory and inhibitory synaptic connectivity, especially in a cell type- and projection-specific manner, may be therapeutically relevant.

Concurrently, we find that the loss of excitatory and inhibitory synaptic connectivity in Cntnap2 KO mice is associated with a decrease in the magnitude of phase-locked firing of inhibitory and excitatory neurons to delta oscillations *in vivo*. Inhibitory neurons were less phase locked to both theta oscillations, and

they tended to fire later in the oscillatory cycle. These findings were more prominent during locomotion, suggesting that the effects from changes in connectivity can be more prominent during specific conditions or arousal states. Dysfunctional oscillations have often been reported in humans diagnosed with ASD and have been proposed as biomarkers (Rojas and Wilson, 2014; Simon and Wallace, 2016; Sidorov et al., 2017). Specifically, delta (4 Hz) oscillations in mPFC can entrain other brain regions, such as the amygdala during fear expression and the ventral tegmental area and hippocampus during working memory (Fujisawa and Buzsáki, 2011). Theta (4–8 Hz) oscillations in the mPFC have been associated with signaling safety under conditions of learned fear (Likhhtik et al., 2014). Thus, the phase-locking alterations observed in mPFC neurons of Cntnap2 KO mice could be linked to some of the cognitive and affective behavioral disruptions displayed by this mouse model.

The mPFC electrophysiological alterations we observed in Cntnap2 KO mice could underlie some of the autism-related phenotypes in the model, such as deficits in social interactions and communication, as supported by observations that increasing the ratio of excitation to inhibition in the mPFC could disrupt social interactions in WT mice (Yizhar et al., 2011). Moreover, an opsin-mediated increase in PV<sup>+</sup> cell excitability or a decrease in pyramidal neuron activity within the prelimbic mPFC can rescue social behavior and hyperactivity in Cntnap2 KO mice (Selimbeyoglu et al., 2017). Such disruptions in E/I balance could also reflect as broader-scale alterations in oscillatory power and synchrony and could be mechanistically linked to the altered representation of social stimuli in the mPFC of Cntnap2 KO mice (Levy et al., 2018).

Future studies need to dissect the inputs and outputs of the prefrontal cortex in a cell type- and projection-specific manner to uncover whether changes in excitatory and inhibitory connectivity are generalized or selectively impaired in specific circuits. This will require experiments in which Cntnap2 is conditionally deleted in specific cell types using Cre-Lox techniques. Also, it is not known whether the synaptic and population dynamic changes we found can be reversed or ameliorated by restoring Cntnap2 gene expression in adulthood or whether very early interventions will be needed. Finally, it will be important to understand how the delta and theta phase locking affects the recruitment of other connected brain regions, especially in the context of social engagement.

## STAR★METHODS

Detailed methods are provided in the online version of this paper and include the following:

- KEY RESOURCES TABLE
- CONTACT FOR REAGENT AND RESOURCE SHARING
- EXPERIMENTAL MODEL AND SUBJECT DETAILS
- METHOD DETAILS
  - Slice preparation
  - Electrophysiology
  - Current-clamp recordings
  - Voltage-clamp recordings
  - Evoked Excitatory Postsynaptic Currents

- Laser Scanning Photostimulation (LSPS)
- Immunohistochemistry
- Cell density measurements
- Tissue preparation and electron microscopy
- Surgery, behavioral habituation, and *in vivo* electrophysiology
- Motion detection
- **QUANTIFICATION AND STATISTICAL ANALYSIS**
  - Local Field Potential Analysis
  - *In vivo* Unit Clustering and Analysis
- **DATA AND SOFTWARE AVAILABILITY**

#### SUPPLEMENTAL INFORMATION

Supplemental Information can be found online at <https://doi.org/10.1016/j.celrep.2019.05.006>.

#### ACKNOWLEDGMENTS

P.G., J.T., and M.T.L. were supported by NIH grants 1R01MH101198, U01 NS094286, R01 MH105427, and U54 HD87101. M.T.L. was funded by the UCLA Eugene Cota-Robles Fellowship, NSF-GRFP DGE-0707424, NIMH T32MH073526, a UCLA Neurobehavioral Genetics Training Grant, the UCLA Dissertation Year Fellowship, and NIH grant 5U01NS094286. T.S. was supported by a postdoctoral fellowship from the Epilepsy Foundation. S.M. was supported by NIH DA034178. D.H.G. was supported by NIH grants P50 HD 055784-12 and U01 MH115746-02 and the Simons Foundation Grant 401457. We thank Tünde Magyar and Renáta Pop for excellent technical assistance. The project is supported by the European Union and co-financed by the European Social Fund (grant agreement no. EFOP-3.6.2-16-2017-0008: The Role of Neuro-inflammation in Neurodegeneration: From Molecules to Clinics). B.R. was supported by the János Bolyai Research Fellowship from the Hungarian Academy of Sciences and by ÚNKP-18-4 New National Excellence Program of the Ministry of Human Capacities. Silicon microprobes were supported by NSF Neuronex Award 1707408.

#### AUTHOR CONTRIBUTIONS

M.T.L., D.H.G., and P.G. designed the experiments. M.T.L. carried out slice recordings, neuronal anatomy experiments, *in vivo* experiments, and analyzed the data. J.T. analyzed *in vivo* recordings. T.S. helped with experiment design and built the *in vivo* recording setup. I.B. performed surgeries, *in vivo* recordings, and immunohistochemistry. T.I. and R.S. performed the LSPS experiments and analysis, and X.X. helped with experiment design. G.M.M. and B.R. performed the electron microscopy and analysis. A.M., S.C., and K.Y.C. performed the immunohistochemistry. A.F., R.G., N.S., and D.T. performed spike sorting in PyClust and helped with *in vivo* recordings. M.A. performed the dendrite tracing. H.D. helped with mouse breeding and genotyping. O.P. contributed to experiment design. S.M. provided custom-built silicon microprobes and helped with setting up the *in vivo* electrophysiological recordings. M.T.L., J.T., and P.G. wrote the manuscript.

#### DECLARATION OF INTERESTS

The authors declare no competing interests.

Received: August 14, 2018  
 Revised: February 20, 2019  
 Accepted: April 30, 2019  
 Published: May 28, 2019

#### REFERENCES

Alarcón, M., Abrahams, B.S., Stone, J.L., Duvall, J.A., Perederiy, J.V., Bomar, J.M., Sebat, J., Wigler, M., Martin, C.L., Ledbetter, D.H., et al. (2008). Linkage,

association, and gene-expression analyses identify CNTNAP2 as an autism-susceptibility gene. *Am. J. Hum. Genet.* *82*, 150–159.

American Psychiatric Association. (2013). *Diagnostic and Statistical Manual of Mental Disorders*, 5th ed. DSM-5 (American Psychiatric Association).

Anderson, G.R., Galfin, T., Xu, W., Aoto, J., Malenka, R.C., and Sudhof, T.C. (2012). Candidate autism gene screen identifies critical role for cell-adhesion molecule CASPR2 in dendritic arborization and spine development. *Proc. Natl. Acad. Sci. USA* *109*, 18120–18125.

Antoine, M.W., Langberg, T., Schnepel, P., and Feldman, D.E. (2019). Increased excitation-inhibition ratio stabilizes synapse and circuit excitability in four autism mouse models. *Neuron* *101*, 648–661.

Arking, D.E., Cutler, D.J., Brune, C.W., Teslovich, T.M., West, K., Ikeda, M., Rea, A., Guy, M., Lin, S., Cook, E.H., and Chakravarti, A. (2008). A Common Genetic Variant in the Neurexin Superfamily Member CNTNAP2 Increases Familial Risk of Autism. *Am. J. Hum. Genet.* *82*, 160–164.

Banerjee, A., Rikhye, R.V., Breton-Provencher, V., Tang, X., Li, C., Li, K., Runyan, C.A., Fu, Z., Jaenisch, R., and Sur, M. (2016). Jointly reduced inhibition and excitation underlies circuit-wide changes in cortical processing in Rett syndrome. *Proc. Natl. Acad. Sci. USA* *113*, E7287–E7296.

Belichenko, N.P., Belichenko, P.V., and Mobley, W.C. (2009). Evidence for both neuronal cell autonomous and nonautonomous effects of methyl-CpG-binding protein 2 in the cerebral cortex of female mice with *Mecp2* mutation. *Neurobiol. Dis.* *34*, 71–77.

Brumback, A.C., Ellwood, I.T., Kjaerby, C., Iafrati, J., Robinson, J., Robinson, S., Lee, A.T., Patel, T., Nagaraj, S., Davatolhagh, F., et al. (2018). Identifying specific prefrontal neurons that contribute to autism-associated abnormalities in physiology and social behavior. *Mol. Psychiatry* *23*, 2078–2089.

Buzsáki, G., Anastassiou, C.A., and Koch, C. (2012). The origin of extracellular fields and currents—EEG, ECoG, LFP and spikes. *Nat. Rev. Neurosci.* *13*, 407–420.

Calverley, R.K.S., and Jones, D.G. (1990). Contributions of dendritic spines and perforated synapses to synaptic plasticity. *Brain Res. Brain Res. Rev.* *15*, 215–249.

Cea-Del Rio, C.A., and Huntsman, M.M. (2014). The contribution of inhibitory interneurons to circuit dysfunction in Fragile X Syndrome. *Front. Cell. Neurosci.* *8*, 245.

Chen, J.A., Peñagarikano, O., Belgard, T.G., Swarup, V., and Geschwind, D.H. (2015). The emerging picture of autism spectrum disorder: genetics and pathology. *Annu. Rev. Pathol.* *10*, 111–144.

Cruz-Martin, A., Crespo, M., and Portera-Cailliau, C. (2010). Delayed Stabilization of Dendritic Spines in Fragile X Mice. *J. Neurosci.* *30*, 7793–7803.

Curia, G., Papouin, T., Séguéla, P., and Avoli, M. (2009). Downregulation of tonic GABAergic inhibition in a mouse model of fragile X syndrome. *Cereb. Cortex* *19*, 1515–1520.

Dani, V.S., Chang, Q., Maffei, A., Turrigiano, G.G., Jaenisch, R., and Nelson, S.B. (2005). Reduced cortical activity due to a shift in the balance between excitation and inhibition in a mouse model of Rett syndrome. *Proc. Natl. Acad. Sci. USA* *102*, 12560–12565.

Dantzker, J.L., and Callaway, E.M. (2000). Laminar sources of synaptic input to cortical inhibitory interneurons and pyramidal neurons. *Nat. Neurosci.* *3*, 701–707.

de la Torre-Ubieta, L., Won, H., Stein, J.L., and Geschwind, D.H. (2016). Advancing the understanding of autism disease mechanisms through genetics. *Nat. Med.* *22*, 345–361.

Du, J., Blanche, T.J., Harrison, R.R., Lester, H.A., and Masmanidis, S.C. (2011). Multiplexed, high density electrophysiology with nanofabricated neural probes. *PLoS One* *6*, e26204.

Fiala, J.C., Allwardt, B., and Harris, K.M. (2002). Dendritic spines do not split during hippocampal LTP or maturation. *Nat. Neurosci.* *5*, 297–298.

Fujisawa, S., and Buzsáki, G. (2011). A 4 Hz oscillation adaptively synchronizes prefrontal, VTA, and hippocampal activities. *Neuron* *72*, 153–165.

- Ganeshina, O., Berry, R.W., Petralia, R.S., Nicholson, D.A., and Geinisman, Y. (2004). Synapses with a segmented, completely partitioned postsynaptic density express more AMPA receptors than other axospinous synaptic junctions. *Neuroscience* 125, 615–623.
- Gdalyahu, A., Lazaro, M., Penagarikano, O., Golshani, P., Trachtenberg, J.T., and Geschwind, D.H. (2015). Correction: The Autism Related Protein Contactin-Associated Protein-Like 2 (CNTNAP2) Stabilizes New Spines: An In Vivo Mouse Study. *PLoS One* 10, e0129638.
- Geinisman, Y. (1993). Perforated axospinous synapses with multiple, completely partitioned transmission zones: probable structural intermediates in synaptic plasticity. *Hippocampus* 3, 417–433.
- Geschwind, D.H. (2011). Genetics of autism spectrum disorders. *Trends Cogn. Sci.* 15, 409–416.
- Gibson, J.R., Bartley, A.F., Hays, S.A., and Huber, K.M. (2008). Imbalance of neocortical excitation and inhibition and altered UP states reflect network hyperexcitability in the mouse model of fragile X syndrome. *J. Neurophysiol.* 100, 2615–2626.
- Gilman, S.R., Iossifov, I., Levy, D., Ronemus, M., Wigler, M., and Vitkup, D. (2011). Rare de novo variants associated with autism implicate a large functional network of genes involved in formation and function of synapses. *Neuron* 70, 898–907.
- Golomb, D., and Hansel, D. (2000). The number of synaptic inputs and the synchrony of large, sparse neuronal networks. *Neural Comput.* 12, 1095–1139.
- Greer, P.L., Hanayama, R., Bloodgood, B.L., Mardinly, A.R., Lipton, D.M., Flavell, S.W., Kim, T.K., Griffith, E.C., Waldon, Z., Maehr, R., et al. (2010). The Angelman Syndrome protein Ube3A regulates synapse development by ubiquitinating arc. *Cell* 140, 704–716.
- Grossmann, T. (2013). The role of medial prefrontal cortex in early social cognition. *Front. Hum. Neurosci.* 7, 340.
- Harrison, R.R., and Charles, C. (2003). A low-power low-noise CMOS amplifier for neural recording applications. *IEEE J. Solid-State Circuits* 38, 958–965.
- Iossifov, I., O’Roak, B.J., Sanders, S.J., Ronemus, M., Krumm, N., Levy, D., Stessman, H.A., Witherspoon, K.T., Vives, L., Patterson, K.E., et al. (2014). The contribution of de novo coding mutations to autism spectrum disorder. *Nature* 515, 216–221.
- Jurgensen, S., and Castillo, P.E. (2015). Selective Dysregulation of Hippocampal Inhibition in the Mouse Lacking Autism Candidate Gene CNTNAP2. *J. Neurosci.* 35, 14681–14687.
- Kim, J.-W., Park, K., Kang, R.J., Gonzalez, E.L.T., Kim, D.G., Oh, H.A., Seung, H., Ko, M.J., Kwon, K.J., Kim, K.C., et al. (2019). Pharmacological modulation of AMPA receptor rescues social impairments in animal models of autism. *Neuropsychopharmacology* 44, 314–323.
- Klausberger, T., and Somogyi, P. (2008). Neuronal Diversity and Temporal Dynamics: The Unity of Hippocampal Circuit Operations. *Science* 321, 53–57.
- Krishnan, A., Zhang, R., Yao, V., Theesfeld, C.L., Wong, A.K., Tadych, A., Volfovsky, N., Packer, A., Lash, A., and Troyanskaya, O.G. (2016). Genome-wide prediction and functional characterization of the genetic basis of autism spectrum disorder. *Nat. Neurosci.* 19, 1454–1462.
- Leppa, V.M., Kravitz, S.N., Martin, C.L., Andrieux, J., Le Caignec, C., Martin-Coignard, D., DyBuncio, C., Sanders, S.J., Lowe, J.K., Cantor, R.M., et al. (2016). Rare Inherited and De Novo CNVs Reveal Complex Contributions to ASD Risk in Multiplex Families. *Am. J. Hum. Genet.* 99, 540–554.
- Levy, D.R., Tamir, T., Kaufman, M., Weissbrod, A., Schneidman, E., and Yizhar, O. (2018). Dynamics of social representation in the mouse prefrontal cortex. *bioRxiv*. <https://doi.org/10.1101/321182>.
- Likhtik, E., Stujenske, J.M., Topiwala, M.A., Harris, A.Z., and Gordon, J.A. (2014). Prefrontal entrainment of amygdala activity signals safety in learned fear and innate anxiety. *Nat. Neurosci.* 17, 106–113.
- Liska, A., Bertero, A., Gomolka, R., Sabbioni, M., Galbusera, A., Barsotti, N., Panzeri, S., Scattoni, M.L., Pasqualetti, M., and Gozzi, A. (2018). Homozygous Loss of Autism-Risk Gene CNTNAP2 Results in Reduced Local and Long-Range Prefrontal Functional Connectivity. *Cereb. Cortex* 28, 1141–1153.
- Nikonenko, I., Jourdain, P., Alberi, S., Toni, N., and Muller, D. (2002). Activity-induced changes of spine morphology. *Hippocampus* 12, 585–591.
- O’Roak, B.J., Vives, L., Fu, W., Egertson, J.D., Stanaway, I.B., Phelps, I.G., Carvill, G., Kumar, A., Lee, C., Ankenman, K., et al. (2012). Multiplex targeted sequencing identifies recurrently mutated genes in autism spectrum disorders. *Science* 338, 1619–1622.
- Parikshak, N.N., Luo, R., Zhang, A., Won, H., Lowe, J.K., Chandran, V., Horvath, S., and Geschwind, D.H. (2013). Integrative functional genomic analyses implicate specific molecular pathways and circuits in autism. *Cell* 155, 1008–1021.
- Peñagarikano, O., Abrahams, B.S., Herman, E.I., Winden, K.D., Gdalyahu, A., Dong, H., Sonnenblick, L.I., Gruver, R., Almajano, J., Bragin, A., et al. (2011). Absence of CNTNAP2 leads to epilepsy, neuronal migration abnormalities, and core autism-related deficits. *Cell* 147, 235–246.
- Polack, P.-O., Friedman, J., and Golshani, P. (2013). Cellular mechanisms of brain state-dependent gain modulation in visual cortex. *Nat. Neurosci.* 16, 1331–1339.
- Poliak, S., Gollan, L., Martinez, R., Custer, A., Einheber, S., Salzer, J.L., Trimmer, J.S., Shrager, P., and Peles, E. (1999). Caspr2, a new member of the neurexin superfamily, is localized at the juxtaparanodes of myelinated axons and associates with K<sup>+</sup> channels. *Neuron* 24, 1037–1047.
- Poliak, S., Gollan, L., Salomon, D., Berglund, E.O., Ohara, R., Ranscht, B., and Peles, E. (2001). Localization of Caspr2 in Myelinated Nerves Depends on Axon-Glia Interactions and the Generation of Barriers along the Axon. *J. Neurosci* 21, 7568–7575.
- Poliak, S., Salomon, D., Elhanany, H., Sabanay, H., Kiernan, B., Pevny, L., Stewart, C.L., Xu, X., Chiu, S.Y., Shrager, P., et al. (2003). Juxtaparanodal clustering of Shaker-like K<sup>+</sup> channels in myelinated axons depends on Caspr2 and TAG-1. *J. Cell Biol.* 162, 1149–1160.
- Poot, M., Beyer, V., Schwaab, I., Damatova, N., Van’t Slot, R., Prothero, J., Holder, S.E., and Haaf, T. (2010). Disruption of CNTNAP2 and additional structural genome changes in a boy with speech delay and autism spectrum disorder. *Neurogenetics* 11, 81–89.
- Redcay, E., Moran, J.M., Mavros, P.L., Tager-Flusberg, H., Gabrieli, J.D., and Whitfield-Gabrieli, S. (2013). Intrinsic functional network organization in high-functioning adolescents with autism spectrum disorder. *Front. Hum. Neurosci.* 7, 573.
- Rojas, D.C., and Wilson, L.B. (2014).  $\gamma$ -band abnormalities as markers of autism spectrum disorders. *Biomarkers Med.* 8, 353–368.
- Sanders, S.J., Murtha, M.T., Gupta, A.R., Murdoch, J.D., Raubeson, M.J., Willsey, A.J., Ercan-Sencicek, A.G., DiLullo, N.M., Parikshak, N.N., Stein, J.L., et al. (2012). De novo mutations revealed by whole-exome sequencing are strongly associated with autism. *Nature* 485, 237–241.
- Schneider, C.A., Rasband, W.S., and Eliceiri, K.W. (2012). NIH Image to ImageJ: 25 years of image analysis. *Nat. Methods* 9, 671–675.
- Scott, R., Sánchez-Aguilera, A., van Elst, K., Lim, L., Dehorter, N., Bae, S.E., Bartolini, G., Peles, E., Kas, M.J.H., Bruining, H., and Marín, O. (2019). Loss of Cntnap2 Causes Axonal Excitability Deficits, Developmental Delay in Cortical Myelination, and Abnormal Stereotyped Motor Behavior. *Cereb. Cortex* 29, 586–597.
- Scott-Van Zeeland, A.A., Abrahams, B.S., Alvarez-Retuerto, A.I., Sonnenblick, L.I., Rudie, J.D., Ghahremani, D., Mumford, J.A., Poldrack, R.A., Dapretto, M., Geschwind, D.H., and Bookheimer, S.Y. (2010). Altered Functional Connectivity in Frontal Lobe Circuits Is Associated with Variation in the Autism Risk Gene CNTNAP2. *Sci. Transl. Med.* 2, 56ra80.
- Selimbeyoglu, A., Kim, C.K., Inoue, M., Lee, S.Y., Hong, A.S.O., Kauvar, I., Ramakrishnan, C., Fenno, L.E., Davidson, T.J., Wright, M., and Deisseroth, K. (2017). Modulation of prefrontal cortex excitation/inhibition balance rescues social behavior in CNTNAP2-deficient mice. *Sci. Transl. Med.* 9, eaah6733.
- Shi, Y., Nenadic, Z., and Xu, X. (2010). Novel use of matched filtering for synaptic event detection and extraction. *PLoS One* 5, e15517.



- Shobe, J.L., Claar, L.D., Parhami, S., Bakhrin, K.I., and Masmanidis, S.C. (2015). Brain activity mapping at multiple scales with silicon microprobes containing 1,024 electrodes. *J. Neurophysiol.* *114*, 2043–2052.
- Sidorov, M.S., Deck, G.M., Dolatshahi, M., Thibert, R.L., Bird, L.M., Chu, C.J., and Philpot, B.D. (2017). Delta rhythmicity is a reliable EEG biomarker in Angelman syndrome: a parallel mouse and human analysis. *J. Neurodev. Disord.* *9*, 17.
- Simon, D.M., and Wallace, M.T. (2016). Dysfunction of sensory oscillations in Autism Spectrum Disorder. *Neurosci. Biobehav. Rev.* *68*, 848–861.
- Sorra, K.E., Fiala, J.C., and Harris, K.M. (1998). Critical assessment of the involvement of perforations, spinules, and spine branching in hippocampal synapse formation. *J. Comp. Neurol.* *398*, 225–240.
- Strauss, K.A., Puffenberger, E.G., Huentelman, M.J., Gottlieb, S., Dobrin, S.E., Parod, J.M., Stephan, D.A., and Morton, D.H. (2006). Recessive Symptomatic Focal Epilepsy and Mutant Contactin-Associated Protein-like 2. *N. Engl. J. Med.* *354*, 1370–1377.
- Toni, N., Buchs, P.A., Nikonenko, I., Bron, C.R., and Muller, D. (1999). LTP promotes formation of multiple spine synapses between a single axon terminal and a dendrite. *Nature* *402*, 421–425.
- Varea, O., Martin-de-Saavedra, M.D., Kopeikina, K.J., Schürmann, B., Fleming, H.J., Fawcett-Patel, J.M., Bach, A., Jang, S., Peles, E., Kim, E., and Penzes, P. (2015). Synaptic abnormalities and cytoplasmic glutamate receptor aggregates in contactin associated protein-like Caspr2 knockout neurons. *Proc. Natl. Acad. Sci. USA* *112*, 6176–6181.
- Voineagu, I., Wang, X., Johnston, P., Lowe, J.K., Tian, Y., Horvath, S., Mill, J., Cantor, R.M., Blencowe, B.J., and Geschwind, D.H. (2011). Transcriptomic analysis of autistic brain reveals convergent molecular pathology. *Nature* *474*, 380–384.
- Wallace, M.L., Burette, A.C., Weinberg, R.J., and Philpot, B.D. (2012). Maternal loss of Ube3a produces an excitatory/inhibitory imbalance through neuron type-specific synaptic defects. *Neuron* *74*, 793–800.
- Xu, X., Olivas, N.D., Levi, R., Ikrar, T., and Nenadic, Z. (2010). High precision and fast functional mapping of cortical circuitry through a novel combination of voltage sensitive dye imaging and laser scanning photostimulation. *J. Neurophysiol.* *103*, 2301–2312.
- Yizhar, O., Fenno, L.E., Prigge, M., Schneider, F., Davidson, T.J., O’Shea, D.J., Sohal, V.S., Goshen, I., Finkelstein, J., Paz, J.T., et al. (2011). Neocortical excitation/inhibition balance in information processing and social dysfunction. *Nature* *477*, 171–178.
- Zhou, Y., Kaiser, T., Monteiro, P., Zhang, X., Van der Goes, M.S., Wang, D., Barak, B., Zeng, M., Li, C., Lu, C., et al. (2016). Mice with Shank3 Mutations Associated with ASD and Schizophrenia Display Both Shared and Distinct Defects. *Neuron* *89*, 147–162.

## STAR★METHODS

## KEY RESOURCES TABLE

| REAGENT or RESOURCE                                        | SOURCE                   | IDENTIFIER                                                                                                                                                    |
|------------------------------------------------------------|--------------------------|---------------------------------------------------------------------------------------------------------------------------------------------------------------|
| Antibodies                                                 |                          |                                                                                                                                                               |
| Alexa-555 conjugated Streptavidin                          | Invitrogen/ ThermoFisher | Cat# S21381; RRID: AB_2307336                                                                                                                                 |
| Alexa 488 conjugated Streptavidin                          | Invitrogen/ ThermoFisher | Cat# S11223; RRID: AB_2336881                                                                                                                                 |
| Anti-Parvalbumin Antibody                                  | Sigma                    | Cat# P3088; RRID: AB_477329                                                                                                                                   |
| Experimental Models: Organisms/Strains                     |                          |                                                                                                                                                               |
| CNTNAP2 KO Mice                                            | Elior Peles              | N/A                                                                                                                                                           |
| PV-Cre Mice                                                | JAX                      | 008069                                                                                                                                                        |
| Ai9 Mice                                                   | JAX                      | 007909                                                                                                                                                        |
| Software and Algorithms                                    |                          |                                                                                                                                                               |
| Ephus                                                      | Janelia Research Campus  | N/A                                                                                                                                                           |
| WinWCP, WinEDR                                             | Strathclyde              | N/A                                                                                                                                                           |
| MiniAnalysis                                               | Synaptosoft              | N/A                                                                                                                                                           |
| MATLAB code for analysis of phase-locking and correlations | Golshani Lab             | <a href="https://github.com/jtaxidis/Lazaro-et-al.-Cell-Reports-2019/tree/master">https://github.com/jtaxidis/Lazaro-et-al.-Cell-Reports-2019/tree/master</a> |
| Prism                                                      | Graphpad                 | Prism 7                                                                                                                                                       |
| PyClust                                                    | Mayank Mehta Lab         | N/A                                                                                                                                                           |
| Custom Silicon Probe Data Acquisition Software (Labview)   | Sotiris Masmanidis Lab   | N/A                                                                                                                                                           |

## CONTACT FOR REAGENT AND RESOURCE SHARING

Further information and requests for resources and reagents should be directed to and will be fulfilled by the Lead Contact, Peyman Golshani ([pgolshani@mednet.ucla.edu](mailto:pgolshani@mednet.ucla.edu)).

## EXPERIMENTAL MODEL AND SUBJECT DETAILS

Cntnap2 null mice were obtained from E. Peles and backcrossed to the C57BL/6J background for over 12 generations. For targeted electrophysiological recordings of parvalbumin-positive interneurons, Cntnap2 heterozygous mice were backcrossed to PV-Cre (Jackson labs number 008069) x Ai9 (Jackson labs number 007909) mice. For spine density analysis, Cntnap2 heterozygous mice were backcrossed with Thy1GFP (Jackson labs x 007788) mice. Experimental mice were obtained from heterozygous crossings and born with the expected Mendelian frequencies; both genders were used. The date of birth was designated at P0 and the three obtained genotypes (wild-type, heterozygous, homozygous knock-out) were housed together with three to four mice per same-sex cage. Mice were kept in a 12-hour light/12-hour dark cycle and had *ad libitum* access to food and water. All procedures involving animals were performed in accordance with the University of California, Los Angeles (UCLA) animal research committee, and the National Institutes of Health *Guide for the Use and Care of Laboratory Animals*.

## METHOD DETAILS

## Slice preparation

Acute coronal slices (300  $\mu$ m thickness) containing the medial prefrontal cortex were prepared from 4 to 6-wk-old Cntnap2 knock-out mice and wild-type littermates. Mice were anaesthetized with isoflurane gas and beheaded after disappearance of toe-pinch reflex. The brain was removed and placed in ice-cold cutting solution consisting of (mM): 222 sucrose, 11 D-glucose, 26 NaHCO<sub>3</sub>, 1 NaH<sub>2</sub>PO<sub>4</sub>, 3 KCl, 7 MgCl<sub>2</sub>, 0.5 CaCl<sub>2</sub>, aerated with 95% O<sub>2</sub>, 5% CO<sub>2</sub>. The brain was cut in a Leica VT1000S Vibratome. Slices were allowed to recover for 30 minutes at 37°C in standard artificial cerebrospinal fluid (ACSF, in mM): 124 NaCl, 2.5 KCl, 26 NaHCO<sub>3</sub>, 1.25 NaH<sub>2</sub>PO<sub>4</sub>, 10 D-glucose, 4 sucrose, 2.5 CaCl<sub>2</sub>, 2 MgCl<sub>2</sub>, aerated with 95% O<sub>2</sub>, 5% CO<sub>2</sub>, and kept at room temperature for at least 40 min until time of recording.

### Electrophysiology

Whole-cell patch-clamp recordings of L2/3 neurons were obtained under visual guidance using infrared DIC video-microscopy and water-immersion 40x objective, with patch pipettes (3-5 MΩ) pulled from borosilicate capillary glass (Sutter) with a Sutter puller. TdTomato-expressing parvalbumin-positive inhibitory neurons were targeted under epifluorescence. All electrophysiological recordings were performed using Multiclamp 700B (Molecular Devices) patch clamp amplifiers and ACSF was maintained at 33–35°C. Signals were filtered at 4 kHz using Bessel filter and digitized at 10 kHz with WinWCP and WinEDR electrophysiology software interface for voltage-clamp recordings (Strathclyde). Current clamp recordings were digitized at 15 and Bessel filtered at 6 kHz. Series/access resistance was monitored in all recordings and compensated in current clamp mode. Recordings were discarded if series resistance changed significantly (> 20%) or exceeded 25 MΩ. Junction potential was not compensated.

### Current-clamp recordings

For intrinsic excitability experiments, the internal pipette solution contained (in mM): 115 KGluc, 20 KCl, 10 HEPES, 10 phosphocreatine, 4 ATP–Mg<sup>2+</sup>, 0.3 GTP–Na<sup>+</sup> (pH 7.2, 270–290 mOsm); in some recordings, 0.2% biocytin was added to the solution. Patched pyramidal excitatory neurons were identified and included in the analysis based on their action potential firing characteristics. Resting membrane potential ( $V_m$ ) was measured after breaking into the cell (rupturing the patch) and applying zero current. Input resistance ( $R_{in}$ ) was calculated as the slope of the linear fit of the voltage-current plot, generated from a family of negative and positive 500 ms current injections (–60 pA to +60 pA at 20 pA intervals, for pyramidal cells; –150 pA to +150 pA at 50 pA intervals, for parvalbumin-positive interneurons). The membrane decay constant ( $\tau$ ) was calculated by fitting a single exponential curve to the current-voltage plot that resulted from a –20 pA current injection. Cell membrane capacitance ( $C_m$ ) was given by  $C_m = \tau/R_{in}$ . For assessment of intrinsic excitability, cells were clamped at –70 mV and injected a series of increasing current steps at 50 pA intervals. Action potential properties were determined from the first action potential elicited by minimum current injection. The spike adaptation ratio was calculated by dividing the last inter-spike interval to the first inter-spike interval in an action potential train elicited by a 500 ms pulse of 200 pA. All data was analyzed using custom-written MATLAB software. Unless specified otherwise, sample size  $n$  was defined as cell number and all statistical tests were performed based on the number of cells.

### Voltage-clamp recordings

Miniature excitatory postsynaptic currents (mEPSCs) were isolated by applying (in mM): 0.5 tetrodotoxin (TTX) and 10 picrotoxin to ACSF (described above). Pipette internal solution contained (in mM): 20 KCl, 10 Na-phosphocreatinine, 100 cesium methyl sulfonate, 3 QX-314, 10 HEPES, 4 ATP–Mg<sup>2+</sup> and 0.3 GTP–Na<sup>+</sup> (pH 7.2, 270–290 mOsm). Recordings were performed with cells clamped at –70 mV. Miniature inhibitory postsynaptic currents (mIPSCs) were isolated by applying (in mM): 0.5 tetrodotoxin (TTX), 10 CNQX, and 50 APV to ACSF. A high-chloride pipette internal solution was used, which contained (in mM): 120 KCl, 10 HEPES, 4 ATP–Mg<sup>2+</sup>, 0.3 GTP–Na<sup>+</sup> and 10 Na-phosphocreatinine (pH 7.2, 270–290 mOsm). Recordings were performed with cells clamped at –50 mV. Miniature and spontaneous events were recorded for 2 min. MiniAnalysis software (Synaptosoft) was used to automatically identify synaptic events, based on template parameters. Events were then manually examined to exclude false positives. For voltage clamp recordings with a cesium-containing electrode, pyramidal cells were targeted based on soma shape and identity was manually verified based on EPSC decay, where cells with mean EPSC decay time constant  $\leq 2$  ms were considered to likely inhibitory and excluded. Events were excluded if the 10%–90% rise time was > 2 ms, as these events were likely recorded from synapses far from the soma and with poor space clamp. Inter-event intervals (event frequency), amplitude, decay time constant, area, 10%–90% rise time, and half-width, were analyzed and comparisons between groups were analyzed by Student's  $t$  test. Grouped data are expressed as mean  $\pm$  SEM. Unless specified otherwise, sample size  $n$  was defined as cell number and all statistical tests were performed based on the number of cells.

### Evoked Excitatory Postsynaptic Currents

A tungsten concentric bipolar stimulating electrode (WPI) was placed in the white matter to stimulate axon fibers emerging from the anterior forceps of the corpus callosum, which project onto a whole-cell recorded L2/3 pyramidal neuron in PL-mPFC, voltage-clamped at –70 mV. Input-output curves were derived by increasing the stimulus duration (0.1 ms increments) and recording current responses in the recorded postsynaptic neurons. Short-term plasticity was assessed by measuring paired-pulse ratios, calculated as the peak amplitudes of 10 averaged episodes at various inter-stimulus intervals (25, 50, 100, 500ms). AMPA/NMDA ratios were measured by voltage-clamping the cells at a holding potential of –70 mV for AMPA currents and +40 mV for NMDA currents. Peak amplitude current responses were averaged over 10 episodes. Peak NMDA currents were measured after the offset of AMPA currents (25–30 ms post-stimulus) within the same cell. Data was analyzed manually using WinEDR software and plotted in MATLAB. Unless specified otherwise, sample size  $n$  was defined as cell number and all statistical tests were performed based on the number of cells.

### Laser Scanning Photostimulation (LSPS)

Coronal sections of medial prefrontal cortex were cut 400  $\mu$ m thick with a vibratome (VT1200S, Leica Systems) in sucrose-containing artificial cerebrospinal fluid (ACSF) (in mM: 85 NaCl, 75 sucrose, 2.5 KCl, 25 glucose, 1.25 NaH<sub>2</sub>PO<sub>4</sub>, 4 MgCl<sub>2</sub>, 0.5 CaCl<sub>2</sub>, and 24 NaHCO<sub>3</sub>). Slices were first incubated in sucrose-containing ACSF for 30 min to 1 h at 32°C, and then transferred to recording

ACSF (in mM: 126 NaCl, 2.5 KCl, 26 NaHCO<sub>3</sub>, 2 CaCl<sub>2</sub>, 2 MgCl<sub>2</sub>, 1.25 NaH<sub>2</sub>PO<sub>4</sub>, and 10 glucose) at room temperature. Throughout incubation and recording, the slices were continuously bubbled with 95% O<sub>2</sub>–5% CO<sub>2</sub>.

The design of our laser scanning photostimulation system has been described previously (Xu et al., 2010). A laser unit (model 3501, DPSS Lasers, Santa Clara, CA) was used to generate a 355 nm UV laser for glutamate uncaging. Various laser stimulation positions were achieved through galvanometer-driven X-Y scanning mirrors (Cambridge Technology, Cambridge, MA), as the mirrors and the back aperture of the objective were in conjugate planes, thereby translating mirror positions into different scanning locations at the objective lens focal plane. Data were acquired with a Multiclamp 700B amplifier (Molecular Devices, Sunnyvale, CA), data acquisition boards (models PCI MIO 16E-4 and 6713, National Instruments, Austin, TX), and custom-modified version of Ephus software (Ephus, available at <https://www.ephus.org/>). Data were low-pass filtered at 2 kHz using a Bessel filter, digitized at 10 kHz, and stored on a computer.

Cortical slices were visualized with an upright microscope (BW51X, Olympus) with infrared differential interference contrast optics. Electrophysiological recordings, photostimulation, and imaging of the slice preparations were done in a slice perfusion chamber mounted on a motorized stage of the microscope at room temperature. An aliquot of MNI-caged-L-glutamate (4-methoxy-7-nitroindolyl-caged L-glutamate, Tocris Bioscience, Ellisville, MO) was added to 20–25 mL of circulating ACSF for a concentration of 0.2 mM caged glutamate. To perform whole cell recording, cells were visualized at high magnification (60 × objective, 0.9 NA; LUMPlanFI/IR, Olympus). Excitatory neurons were selected based upon their pyramidal somata detected under differential interference contrast (DIC) microscopy. For experiments to assess photo-stimulation evoked spiking profiles of excitatory in mPFC (similar to our published studies (Shi et al., 2010; Xu et al., 2010)), the patch pipettes (4–6 MΩ resistance) were filled with an K<sup>+</sup> internal solution containing (in mM) 126 K-gluconate, 4 KCl, 10 HEPES, 4 ATP-Mg, 0.3 GTP-Na, and 10 phosphocreatine (pH 7.2, 300 mOsm). For the photostimulation experiments to map synaptic inputs, we used a Cs<sup>+</sup> internal solution containing (in mM) 6 CsCl, 130 CsOH, 130 D-Gluconic acid, 2 MgCl<sub>2</sub>, 0.2 EGTA, 10 HEPES, 2.5 ATP-Na, 0.5 GTP-Na, and 10 phosphocreatine-Na<sub>2</sub> (pH 7.2, 300 mOsm). Because glutamate uncaging agnostically activates both excitatory and inhibitory neurons, we empirically determined the excitatory and inhibitory reversal potentials in L2/3 pyramidal cells to properly isolate EPSCs and IPSCs. Whole-cell voltage-clamp recordings were made from the recorded postsynaptic neurons with LSPS-evoked EPSCs and IPSCs measured at the holding potential of –70 mV and +5 mV, respectively, across photostimulation sites. The internal solution also contained 0.1% biocytin for cell labeling and morphological identification. The morphology of recorded pyramidal neuron was determined using post hoc staining with Cy3-conjugated streptavidin (1:500 dilution; Jackson ImmunoResearch). Once stable whole cell recordings were achieved with good access resistance (usually < 30 MΩ), the microscope objective was switched from 60 × to 4 ×; laser scanning photostimulation (LSPS) was performed through the 4x objective lens. At low magnification (4 × objective lens, 0.16 NA; UplanApo, Olympus), the slice images were acquired by a high-resolution digital CCD camera (Retiga 2000, Q-imaging, Austin, TX) and used for guiding and registering photostimulation sites in cortical slices.

Photostimulation (1.5 ms duration, 15 mW pulses) from a 355 nm UV laser generator (DPSS Lasers, Santa Clara, CA) was delivered to the sample, controlled via an electro-optical modulator and a mechanical shutter. Focal laser spots approximated a Gaussian profile with a diameter of ~50–100 μm. Under our experimental conditions, LSPS evoked action potentials were recorded from stimulation locations within 100 μm of targeted somata of excitatory neurons and occurred within 150 ms post photostimulation. Our calibration analysis indicates that LSPS allows for mapping direct synaptic inputs to recorded neurons. Synaptic currents in patched neurons were detected under voltage clamp. By systematically surveying synaptic inputs from hundreds of different sites across a large cortical region, aggregate synaptic input maps were generated for individual neurons. For our mapping experiments, a standard stimulus grid (16 × 16 stimulation sites, 100 × 60 μm<sup>2</sup> spacing) was used to tessellate mPFC from pia to white matter. The LSPS site spacing was empirically determined to capture the smallest predicted distance in which photostimulation differentially activates adjacent neurons. Glutamate uncaging was delivered sequentially in a nonraster, nonrandom sequence, following a “shifting-X” pattern designed to avoid revisiting the vicinity of recently stimulated sites.

Photostimulation induces two forms of excitatory responses: (1) those that result from direct activation of the recorded neuron's glutamate receptors, and (2) synaptically mediated responses (EPSCs) resulting from the suprathreshold activation of presynaptic excitatory neurons. Responses that occur within 10 ms of laser pulse onset were considered direct; these responses exhibited a distinct waveform and occurred immediately after glutamate uncaging. Synaptic currents with such short latencies are not possible because they would have to occur before the generation of action potentials in photostimulated neurons. Therefore, direct responses were excluded from local synaptic input analysis, but they were used to assess glutamate mediated excitability/responsiveness of recorded neurons. At some locations, synaptic responses were overriding on the relatively small direct responses, and these responses were identified and included in synaptic input analysis. The IPSC input was similarly analyzed as the EPSC input. For data map analysis, we implemented the approach for detection and extraction of photostimulation-evoked postsynaptic current responses as previously described (Shi et al., 2010). LSPS evoked EPSCs/IPSCs were quantified across the 16x16 mapping grid for each cell, and 1–2 individual maps were used per recorded cell. The PSC input from each stimulation site was the measurement of the sum of individual PSCs within the analysis window (> 10 ms to 160 ms post photostimulation), with the baseline spontaneous response subtracted from the photostimulation response of the same site. The value was normalized with the duration of the analysis window (i.e., 150 ms) and expressed as average integrated amplitudes in picoamperes (pA). The analysis window was chosen because photostimulated neurons fire most of their action potentials during this time. For the color-coded map display, data were plotted as the average integrated PSCs amplitude per pixel location (stimulation site), with the color scale coding input strength.



For the group maps obtained across multiple cells, the individual cell maps were first aligned by their slice images using laminar cytoarchitectonic landmarks. Then a new map grid was created to re-sample and average input strength at each site location across cell maps; a smooth version of color-coded map was presented for overall assessments. To further quantitatively compare input strength across cell groups, we measured the total PSC inputs (total synaptic currents) across all map sites (total synaptic input strength) for individual cells. The total EPSC/IPSC input strength ratios were also measured for the cells when both EPSC and IPSC data were available from the same cells.

As virtually all Layer 1 neurons are inhibitory cells, and pyramidal neurons with apical dendritic tufts in layer 1 could fire action potentials when their tufts were stimulated in layer 1 (Dantzker and Callaway, 2000), EPSCs detected after photostimulation in layer 1 were not included for analyses. However, because layer 1 neurons can provide inhibition to layer 2/3 neurons, we did analyze IPSCs detected after photostimulation in layer 1. All data are reported as mean  $\pm$  standard error of the mean (SEM). When comparing two independent groups, a Wilcoxon rank sum test was used. Unless specified otherwise, sample size  $n$  was defined as cell number. A  $P$  value ( $\leq 0.05$ ) was considered statistically significant.

### Immunohistochemistry

For assessment of dendritic morphology and complexity, cells were filled during electrophysiological recordings via passive diffusion of internal pipette solution containing 0.2% biocytin. After recording for at least 10 min, slices were transferred to a 4% PFA solution for overnight fixation, washed for 10 min (x3) in 0.1 M phosphate buffered saline (PBS), blocked with 10% normal goat serum (NGS) containing 0.3% Triton-X in 0.1 M PBS for 1.5 hr, and incubated overnight with an Alexa 555 or Alexa 488-conjugated Streptavidin antibody (1:500, Invitrogen) in 0.1M PBS. Sections were finally washed 3x 10 min in 0.1M PBS and mounted on slides using DAPI Fluoromount-G (Invitrogen) for visualization. We assessed dendritic complexity of biocytin-filled cells by imaging at 20X magnification in an LSM 520 confocal microscope. Z stacks of optical sections (1  $\mu$ m) were compiled and images were processed in NeuroLucida 10 (MFB Biosciences) for Sholl analysis.

For quantification of spine density, Cntnap2 WT and KO mice were crossed with a Thy1-GFP mouse line, which sparsely labels pyramidal neurons, including their dendritic projections and spines. Mice were perfused intracardially with 25 mL 0.1 M PBS, followed by 25 mL of 4% PFA in 0.1 M PBS (at 2 mL/min). The brains were dissected and fixed for at least 24 hr in the same solution. Brains were then sectioned at a thickness of 100  $\mu$ m, using a Leica vibratome. Sections containing the mPFC were mounted on slides using DAPI Fluoromount-G media. Apical and basal dendrites of GFP-expressing L2/3 mPFC neurons were imaged at high resolution using a 63X oil magnification objective on an LSM 520 confocal microscope (Zeiss). Optical sections of 0.32  $\mu$ m were acquired and maximum intensity projections of dendritic arbors were created in ImageJ (NIH). Dendritic segments were chosen using consistent criteria and spines were manually counted. Dendritic spine density was calculated by dividing the total number of spines over a given length of dendrite (spines/ $\mu$ m). Student's  $t$  test was performed for statistical comparison between WT and KO mice.

For quantification of the density of parvalbumin-positive neurons in prelimbic cortex, wild-type and CNTNAP2 knockout mice were deeply anesthetized with 4% isoflurane and intracardially perfused with 4% paraformaldehyde 0.1M phosphate-buffered saline (freshly diluted from 32% stock, Electron Microscopy Sciences). Brains were subsequently removed and incubated in 0.1M phosphate-buffered solution containing 30% sucrose at 4°C for up to 2 days. Brains were then embedded in optimal cutting temperature solution (TissueTech) at  $-80^{\circ}\text{C}$ , and cryosectioned at 50  $\mu$ m thickness. Sections containing the prelimbic cortex were selected for immunostaining with mouse monoclonal anti-parvalbumin antibody (1:200, Sigma, P3088) and goat anti-mouse Alexa 488 secondary antibody (1:500). Confocal images were obtained at 10x magnification using a Zeiss 880 laser-scanning confocal microscope and analyzed using ImageJ (NIH). To establish counts, outlines over the prelimbic cortex were drawn with references to The Allen Mouse Brain Atlas (Allen Institute, <http://mouse.brain-map.org/>) then the number of parvalbumin-positive cells was quantified by hand by a blinded experimenter. Counts for each section were normalized to the size of selected area. Statistical comparisons were performed using Student's  $t$  test with Prism 7 (Graphpad), where  $p$  values less than 0.05 were considered to be statistically significant.

### Cell density measurements

The density of neurons in the prelimbic medial prefrontal cortex was quantified at the light microscopic level (Leica DM750) in toluidine blue-stained semithin sections ( $\sim 300\text{nm}$  thin). Unbiased counting frames of known area (40,000  $\mu\text{m}^2$ ) were superimposed on fields of these sections within the Layers 2/3 pyramidal cell layer using random sampling. The counting units were neuronal nuclei, and they were counted only if these did not contact the two exclusion lines of the counting frame. Within the frame, neuronal nuclei were counted. Cells with obvious glial characteristics were excluded from the analysis. Four sections were quantified per block in order to determine neuronal density in each animal. Our aim was not to make stereologically-rigorous estimates of the absolute values; instead we wanted to determine whether there are significant differences in neuronal density between WT and the CNTNAP2 KO animals.

### Tissue preparation and electron microscopy

Animals from KO and WT groups ( $n = 3$ , respectively) were processed. Mice were deeply anesthetized with isoflurane were perfused transcardially with a mixture of 2% paraformaldehyde (PFA) and 2% glutaraldehyde in 0.1 M phosphate buffer (PB, pH 7.4). Brains were removed and post-fixed overnight at 4°C. 70  $\mu$ m thick sections were cut with a Leica vibratome. Free-floating sections for electron microscopy were post-fixed with 1%  $\text{OsO}_4$ , dehydrated in ascending ethanol series and embedded in epoxy resin (Durcupan;

Sigma, Germany) within Aclar sheets (EMS, Hatfield, PA, USA). Uniform rectangular samples were cut from the prelimbic medial prefrontal cortices (mPFC, approx 1.98–1.94 AP, 3–3.75 DV, 0.25–0.50 ML position) under a Leica S6E dissecting microscope, and mounted on plastic blocks. 60 nm ultrathin sections were cut on a Reichert ultramicrotome, mounted on 300 mesh copper grids, contrasted with lead citrate (Ultrastain II, Leica) and examined with a JEM-1011 transmission electron microscope (JEOL, Tokyo, Japan) equipped with a Mega-View-III digital camera and a Soft Imaging System (SIS, Münster, Germany) for the acquisition of the electron micrographs. Five to ten sections were analyzed per block, and two blocks per animal were used to collect micrographs. Sample areas (at least 50  $\mu\text{m}^2$  per animal) were chosen in a pseudo-random fashion and photographed at a uniform magnification. Postsynaptic dendritic spines, axonal boutons, multi-synaptic boutons (MSB; a single presynaptic bouton that forms separate synapses with multiple spine heads) were identified on electron micrographs. Spine profile area were measured using the engine provided by NIH ImageJ v1.51j8 (Schneider et al., 2012); data were compiled using Excel (Microsoft) and Kaleidagraph (Synergy Software, Reading, PA, USA) software. The means and the effects of the loss of the *Cntnap2* gene was determined by Wilcoxon rank sum test, with a  $p < 0.05$  considered statistically significant. Data collection and quantification was performed blindly, to eliminate bias. We performed electron microscopy using random sampling from single sections to optimize sample size and to detect changes in synaptic features associated with loss of *Cntnap2* in KO mice, compared to WT.

### Surgery, behavioral habituation, and *in vivo* electrophysiology

Adult male and female *Cntnap2* mutant and wild-type mice (2–5 months old) underwent an initial surgery for implantation of a stainless steel head restraint bar on their skull in preparation for *in vivo* electrophysiological recordings. All surgical procedures were performed under isoflurane anesthesia (3%–5% induction, 1.5% maintenance) in a stereotaxic apparatus. Mouse body temperature was monitored and kept at 37°C during surgery using a Harvard Apparatus feedback-controlled heating pad and were administered an subcutaneous injection of carprofen (5 mg/kg of body weight) for systemic analgesia. Mice were allowed to recover for 5 days, during which they were given antibiotic treatment (amoxicillin, 0.25 mg/mL in drinking water). After the recovery period, mice were habituated for at least three days for each of the following stages: human handling (5 min), headbar attachment (10 min), and head fixation on a spherical treadmill (10 min). The treadmill consisted of an 8-inch Styrofoam ball (Graham Sweet), tethered with a metal rod through the middle allowing only one axis of rotation. Air was blown, allowing the ball to float and the mouse to spin the ball and run in place and on top of it (Polack et al., 2013). After habituation, and one day prior to electrophysiological recordings, the mouse received a craniotomy above the medial prefrontal cortex on the right hemisphere (anterior 1.8 mm, lateral 0.5 mm to Bregma). The dura above the exposed brain area was carefully removed in order to facilitate electrode insertion. The exposed skull and brain were covered and sealed with a silicone elastomer sealant (Kwik-Sil, WPI). An additional craniotomy was performed over the posterior cerebellum for placement of a silver chloride electrical reference wire, which was glued into place with dental cement. The mouse was allowed to recover overnight. Mice were given a dose of carprofen on day of recording, to ameliorate any pain associated with the craniotomy surgery.

On the day of the recording, the mouse was head-fixed atop the spherical treadmill, the Kwik-Sil was removed and cortex buffer (135 mM NaCl, 5 mM KCl, 5 mM HEPES, 1.8 mM  $\text{CaCl}_2$  and 1 mM  $\text{MgCl}_2$ ) was immediately placed on top of the craniotomy in order to keep the exposed brain moist. The mouse skull was then stereotaxically aligned and the silicon microprobe coated with a fluorescent dye (Dil, Invitrogen), was stereotaxically lowered using a micromanipulator into the mPFC (relative to bregma: anterior 1.8 mm, lateral 0.5 mm, ventral 2.5 mm). This process was monitored using a surgical microscope (Zeiss STEMI 2000). The microprobes contained a total of 128 electrode recording sites that were densely distributed (hexagonal array geometry with 25 mm vertical spacing and 16–20 mm horizontal spacing) on two prongs (placed 0.4 mm apart), spanning L2/3 and L5 of the prelimbic (PL) and infralimbic (IL) medial prefrontal cortex. Only data from L2/3 prelimbic cortex was used. Once inserted, the probe was allowed to settle among the brain tissue for 1 hr. Recording of brain network activity was done for a total duration of 1 hr after that.

Data acquisition was performed using custom fabricated silicon probes and recorded with LabView Software (Du et al., 2011). Readout was achieved via a custom-built 128-channel detachable head stage module. Head stages contained commercial integrated electronic circuits (Intan Technologies RHA-2164B) (Harrison and Charles, 2003) providing signal multiplexing (32 electrodes per multiplexed output wire), amplification (gain 200), and filtering (0.1–6500 Hz) functions. The head stage contained two 64-pin connectors (Molex, Slimstack 502426-6410) connecting to custom printed circuit boards wire bonded to the silicon microprobes. Analog signals were transmitted through thin flexible cables and subsequently digitized on 16-bit analog-to-digital conversion (ADC) cards (USB-6356, National Instruments). Multiplexed signals were recorded at 800 kHz and de-multiplexed with recording software into a sampling rate of 25 kHz per channel. All ADC cards were synchronized via a shared internal clock. All data acquisition, as well as control of stimulus timing, was performed with custom LabVIEW scripts. All data analysis was carried out with custom MATLAB scripts (Shobe et al., 2015).

After the recording session, mice were anaesthetized with isoflurane and sacrificed. The brain was extracted, sectioned (100  $\mu\text{m}$ ) on a Vibratome (Leica) and mounted on slides with DAPI Fluoromount-G (SouthernBiotech) mounting media. Confocal tiled images were taken to verify microprobe location (Zeiss LSM 800). Anatomical landmarks were used to determine anterior-posterior coordinates relative to bregma. Each of the 128 recording sites was then assigned an approximate coordinate in 3D Cartesian space and classified as belonging to prelimbic (PL) or infralimbic (IL) prefrontal cortex (Allen Brain Atlas).

### Motion detection

Mouse treadmill rotation was recorded as an analog signal, using a custom printed circuit board based on a high sensitivity gaming mouse sensor (Avago ADNS-9500) connected to a microcontroller (Atmel Atmega328). The signal was initially recorded along with electrophysiology at 25 kHz, then down-sampled to 1 kHz, its sample mode value was subtracted, it was turned to absolute values and was smoothed by lowpass filtering  $< 1$  Hz with a first order Butterworth filter. For one set of animals ( $n = 6$ ) motion was detected when the smoothed treadmill motion-signal exceeded  $0.8 \times$  mean of recording and immobility was assumed when it dropped below 0.005 (a.u). For a second set ( $n = 7$ ) these thresholds were changed to  $2 \times$  mean and 0.016 respectively due to increased recording noise. Motion segments shorter than 0.5 s long were discarded, and consecutive segments closer than 0.5 s were concatenated. This processed signal was treated as a proxy of velocity. Distance traveled on the ball per motion segment (motion bout) was approximated as the velocity integral over each segment.

## QUANTIFICATION AND STATISTICAL ANALYSIS

### Local Field Potential Analysis

To compare LFP bandpower, LFP recordings from the channel located closest to L2/3 were selected for each animal. LFPs were down-sampled to 1 kHz and all data points corresponding to either motion or immobility segments were concatenated. Bandpower over all frequency ranges (delta: 1-4 Hz, theta: 5-8 Hz, beta: 12-30 Hz, slow gamma: 30-55 Hz, fast gamma: 80-110 Hz) was computed using a periodogram with a Hamming window.

### In vivo Unit Clustering and Analysis

Single units were isolated using custom spike-detection scripts and PyClust software. Raw data was initially background subtracted, bandpass filtered from 600-6500 Hz, and grouped into channel sets of neighboring electrodes for clustering. For each channel set, putative spikes were detected as any deviation greater than 4 standard deviations from the mean. The features of each spike were calculated (peak amplitude, valley, and trough, principle components) and individual clusters were isolated by outlining boundaries on each projection. Each unit was visually inspected and units that drifted outside recorded channels or were lost during the recording were eliminated. For each clustered unit, all peri-spike extracellular waveforms were collected from the channel that yielded the largest spike amplitude and were bandpass filtered at 600 - 6000 Hz with a first order Butterworth filter. The amplitudes and time-points of each unit's mean waveform peak and trough were computed, together with the unit's mean firing rate and burst index (percentage of consecutive spikes closer than 20 ms). Waveforms from identified units were visually inspected and units with low-quality individual and average waveforms were not included in the analysis ( $n = 25$  rejected units).

To cluster units into broad and narrow spiking, the (i) peak-trough time distance, (ii) peak-trough amplitude ratio and (iii) burst index of all units of all animals were pooled together and z-scored. Principal component analysis was performed on the three variables and the scores from all three principal components were split into two clusters using k-means with squared Euclidean distance measure and 100 clustering repeats. This method yielded two well separated clusters with one containing  $\sim 20\%$  of all units with smaller peak-trough distances and ratios and higher burst indexes compared to the other cluster. Units in that cluster are referred to as 'narrow-spiking' whereas those in the opposite cluster as 'wide-spiking'.

Motion-related firing rates and inter-spike intervals were computed by time-binning each motion bout separately. Their average value and SD were computed after concatenating over all motion segments. Fano-factors were computed as mean/SD of firing rates using 100 ms non-overlapping time bins. Burst indexes were computed by concatenating spike times during motion or immobility accordingly and computing, for each unit, the percentage of consecutive spikes closer than 20 ms. Zero-lag Pearson correlations between firing rates of WS, NS or WS-NS pairs of units were computed per animal. Units with less than 200 spikes were excluded from correlation analysis.

Spike phases of each unit were computed using the LFP recording of the channel yielding the largest spike amplitude for that unit. LFPs were down-sampled at 1 kHz and bandpass filtered over the corresponding oscillation frequency range using a Butterworth bandpass filter matching the passband exactly. The phase of each spike was computed as the angle of the filtered LFP's Hilbert transform at the spike peak. For producing preferred phase distributions of wide or narrow spiking units, only units with  $> 200$  spikes over all motion, or immobility segments accordingly, and with significant phase locking at the corresponding frequency range (Rayleigh test,  $p$  value  $< 0.05$ , Bonferroni corrected over all WS or NS units accordingly) were included. Unless specified otherwise, sample size  $n$  was defined as cell number and all statistical tests were performed based on the number of cells.

## DATA AND SOFTWARE AVAILABILITY

All data generated in the paper will be available upon request from the Lead Contact, Peyman Golshani, [pgolshani@mednet.ucla.edu](mailto:pgolshani@mednet.ucla.edu). MATLAB code used for all in-vivo electrophysiology analysis have been deposited in Github at <https://github.com/jtaxidis/Lazaro-et-al.-Cell-Reports-2019/tree/master>.

**Supplemental Information**

**Reduced Prefrontal Synaptic Connectivity  
and Disturbed Oscillatory Population  
Dynamics in the CNTNAP2 Model of Autism**

**Maria T. Lazaro, Jiannis Taxidis, Tristan Shuman, Iris Bachmutsky, Taruna Ikrar, Rommel Santos, G. Mark Marcello, Apoorva Mylavarapu, Swasty Chandra, Allison Foreman, Rachna Goli, Duy Tran, Nikhil Sharma, Michelle Azhdam, Hongmei Dong, Katrina Y. Choe, Olga Peñagarikano, Sotiris C. Masmanidis, Bence Rácz, Xiangmin Xu, Daniel H. Geschwind, and Peyman Golshani**



## Supplementary Fig. 1

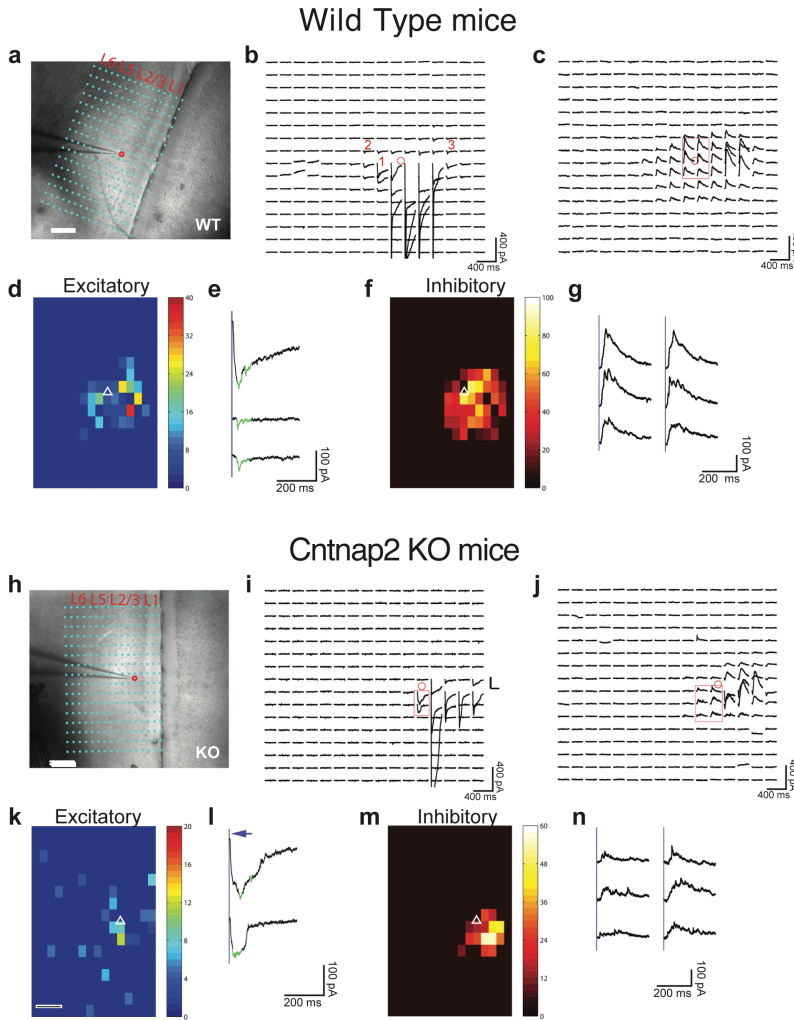

**Supplementary Fig. 1 | Example cortical input map data for *Cntnap2* WT and KO L/3 mPFC excitatory neurons.** Related to Figure 1. **a,h**, Differential interference contrast (DIC) image of mPFC, superimposed with photostimulation sites (cyan dots), spaced at  $100\ \mu\text{m} \times 60\ \mu\text{m}$ , for WT and KO mice. The tip of the patch pipette (recording electrode) and the cell body location of a recorded L2/3 neuron is indicated by a red circle. **b,c,i,j**, Photostimulation-evoked response traces plotted according to their corresponding photostimulation sites, as shown in **a,h**. Traces depict currents recorded 250 ms after stimulation (1.5 ms, 15 mW) onset. Cells were voltage-clamped at  $-70\ \text{mV}$  to detect inward excitatory postsynaptic currents (EPSCs), depicted in **b** and **i**, and at  $+5\ \text{mV}$  to detect inhibitory postsynaptic currents (IPSCs), depicted in **c** and **j**. Excitatory **d,k** and inhibitory **f,m** input maps of average integrated stimulation responses for datasets shown in **b,i** and **c,j**, respectively. Somatic location of the recorded neuron is represented by a white triangle. **e,l** and **g,n** show enlarged insets of selected responses in **b,i** and **c,j**, respectively. Green overlays mark over-riding synaptic responses. Average input amplitudes were calculated as mean integrated amplitudes of EPSCs or IPSCs elicited within the 250 ms post-stimulus onset time-frame. White scale bars represent  $250\ \mu\text{m}$ .

## Supplementary Fig. 2

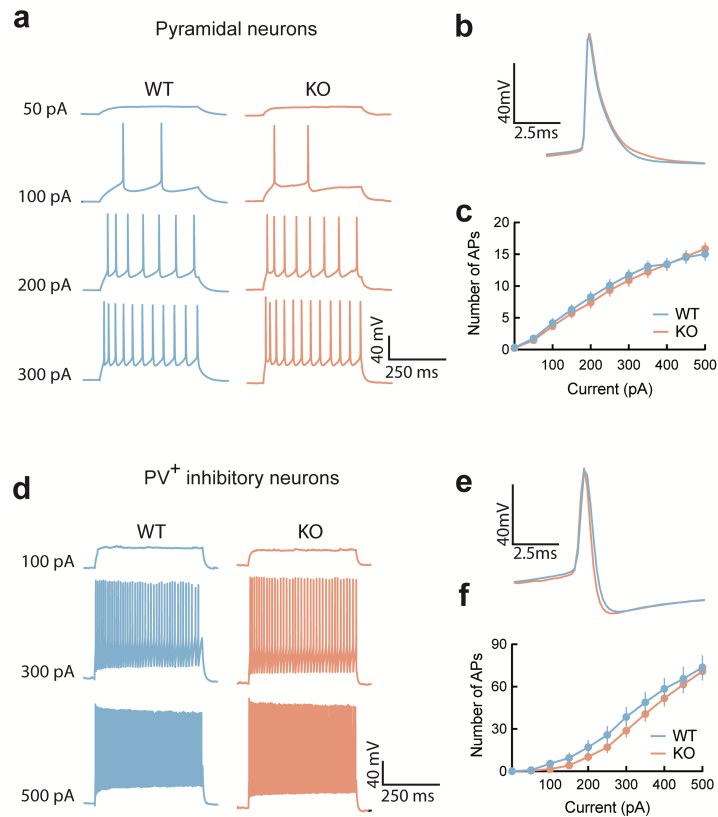

**Supplementary Fig. 2 | Intrinsic excitability of L2/3 pyramidal neurons and parvalbumin-positive (PV+) inhibitory neurons in *Cntnap2* WT and KO mice.** Related to Figure 1. **a,d**, Representative action potential traces from L2/3 WT and KO pyramidal and PV+ neurons, showing responses to various current injections and **b,e**, corresponding average action potential waveforms. **c,f**, Input-output curves showing average number of action potentials elicited by increasing current injections for pyramidal neurons (WT  $n = 28$  cells, KO  $n = 21$  cells;  $P = 0.7057$ , 2way ANOVA) and PV+ inhibitory neurons (WT  $n = 27$  cells, KO  $n = 42$  cells;  $P = 0.2993$ ). Data obtained from current-clamp recordings of neuronal spikes elicited by stimulating with 50 pA step increments, cells clamped at -70mV.

## Supplementary Table 1

### Passive Membrane Properties

| Parameters  | Pyramidal Neurons |              | PV Inhibitory Neurons |             |
|-------------|-------------------|--------------|-----------------------|-------------|
|             | WT                | KO           | WT                    | KO          |
| RMP (mV)    | -73.2 ± 2.0       | -68.7 ± 2.3  | -80.6 ± 1.2           | -78.0 ± 0.8 |
| Rin (mOhms) | 174.1 ± 18.7      | 173.5 ± 21.7 | 93.2 ± 6.3            | 85.1 ± 4.2  |
| Cm (pF)     | 96.1 ± 8.1        | 106.8 ± 12.3 | 69.8 ± 4.2            | 80.5 ± 4.5  |
| Tau (ms)    | 14.7 ± 1.0        | 16.6 ± 0.9   | 6.2 ± 0.2             | 6.4 ± 0.2   |

### Action Potential Features

| Parameters         | Pyramidal Neurons |             | PV Inhibitory Neurons |             |
|--------------------|-------------------|-------------|-----------------------|-------------|
|                    | WT                | KO          | WT                    | KO          |
| Amplitude (mV)     | 84.9 ± 1.7        | 82.1 ± 1.9  | 62.0 ± 2.3            | 64.5 ± 1.7  |
| Half-width (ms)    | 1.0 ± 0.1         | 1.1 ± 0.1   | 0.3 ± 0.0             | 0.3 ± 0.0   |
| AHP Amplitude (mV) | -4.5 ± 1.2        | -4.0 ± 1.7  | -24.0 ± 0.7           | -22.1 ± 0.6 |
| Peak to AHP (ms)   | 3.8 ± 0.5         | 3.1 ± 0.5   | 0.8 ± 0.1             | 0.8 ± 0.0   |
| Threshold (mV)     | -39.3 ± 1.0       | -37.0 ± 0.9 | -39.7 ± 1.0           | -41.0 ± 0.9 |

**Table S1: Passive membrane properties and action potential features of WT and KO pyramidal and PV inhibitory neurons. Related to Figure 1.**

### Supplementary Fig. 3

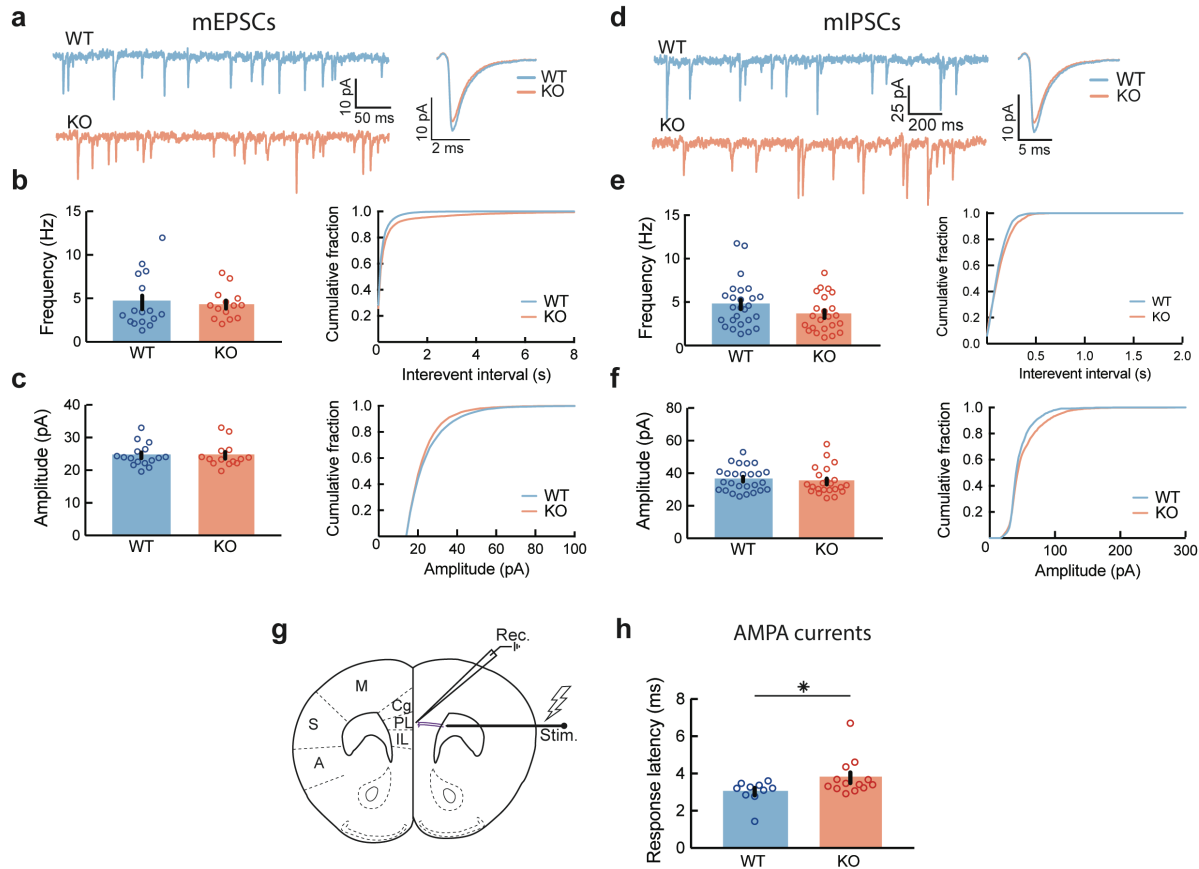

**Supplementary Fig. 3 | In *Cntnap2* KO mice, no significant alterations in PV+ inhibitory neuron mPSCs but increased stimulus response latency in L2/3 pyramidal neurons.** Related to Figure 2. **a-c**, Frequency (WT  $4.5 \pm 0.8$  Hz, KO  $4.3 \pm 0.5$  Hz;  $P = 0.9901$ , Unpaired t test) and amplitude (WT,  $24.5 \pm 0.9$  pA, KO  $24.6 \pm 1.0$ ;  $P = 0.5970$ , Wilcoxon test) of mEPSCs (WT  $n = 17$ , KO  $n = 15$ ) and **d-f**, frequency (WT  $4.7 \pm 0.5$  Hz, KO  $3.6 \pm 0.4$  Hz;  $P = 0.4074$ , Wilcoxon test) and amplitude (WT  $36.0 \pm 1.9$  pA, KO  $37.6 \pm 2.5$  pA;  $P = 0.8238$ , Wilcoxon test) of mIPSCs (WT  $n = 28$ , KO  $n = 25$ ) recorded from parvalbumin-positive (PV) inhibitory neurons are not statistically different between *Cntnap2* KO and WT mice. Distribution of data is represented as box and whiskers plots with mean  $\pm$  SEM. **g**, Monopolar tungsten electrode was used to stimulate long-range axons (purple), which extend from the anterior forceps of the corpus callosum and project onto a patched excitatory neuron in L2/3 mPFC. **h**, Stimulus response onset for L2/3 pyramidal neurons in WT ( $3.03 \pm 0.19$  ms;  $n = 10$  cells) and KO ( $3.77 \pm 0.28$  ms;  $n = 13$  cells) mice shows an increase in evoked AMPA current response latency from time stimulus onset ( $*P = 0.0438$ , Wilcoxon test).

Supplementary Fig. 4

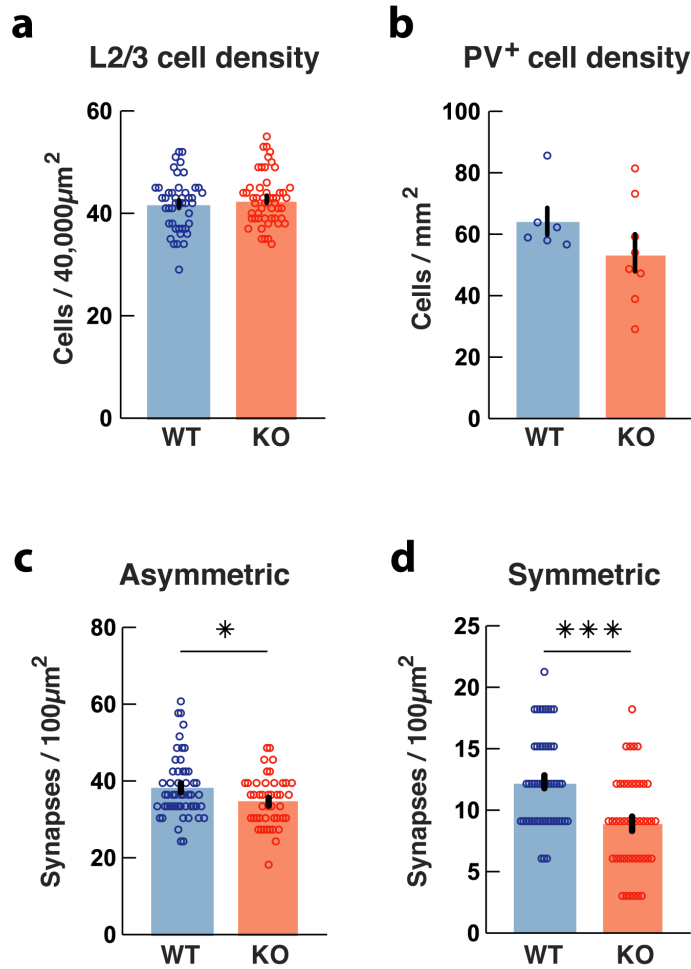

**Supplementary Fig. 4. | Cntnap2 KO mice exhibit unaltered L2/3 neuronal cell density and PV<sup>+</sup> neuron density but reduced asymmetric (excitatory) and symmetric (inhibitory) synapse density in L1 of prelimbic mPFC.** Related to Figure 3. **a.** Prelimbic mPFC L2/3 neuronal density as measured by counting nuclei in  $n=52$  (WT) and  $n=45$  (KO) toluidine blue stained thin sections from  $n=3$  (WT) and  $n=3$  (KO) mice ( $p=0.36$ ). **b.** Prelimbic PV<sup>+</sup> neuron density as measured by counting immuno-labeled PV<sup>+</sup> neurons in  $n=6$  (WT) and  $n=8$  (KO) sections from  $n=4$  (WT) and  $n=4$  (KO) mice ( $p=0.23$ ). **c-d,** Graphs showing quantification of asymmetric (putative excitatory: WT  $38.26 \pm 1.14$  synapses/100  $\mu\text{m}^2$ ,  $n = 52$  fields; KO  $34.63 \pm 0.98$  synapses/100  $\mu\text{m}^2$ ,  $n = 45$  fields; 3 mice per genotype; \* $P= 0.019$ , unpaired t-test) and symmetric synapses (putative inhibitory: WT  $12.33 \pm 0.52$  synapses/100  $\mu\text{m}^2$ ,  $n = 52$  fields; KO  $8.91 \pm 0.58$  synapses/100  $\mu\text{m}^2$ ,  $n = 44$  fields; \*\*\*\* $P < 0.0001$ , unpaired t-test).



## Supplementary Fig. 5

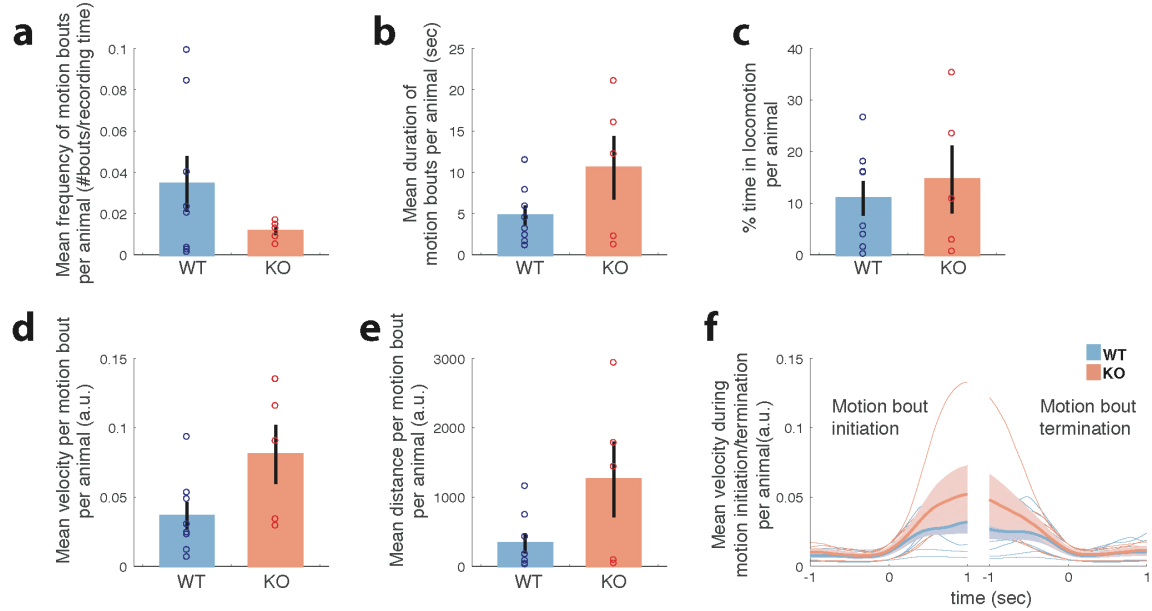

## g Spiking during locomotion

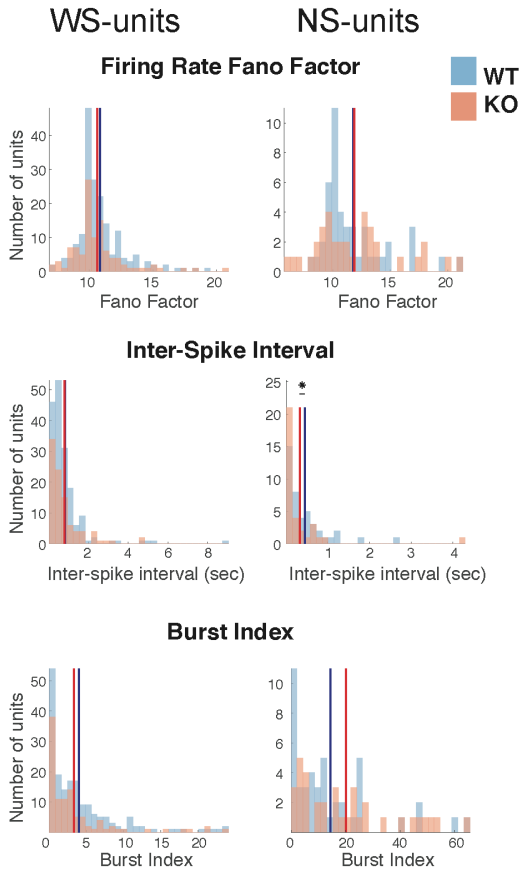

## h Spiking during immobility

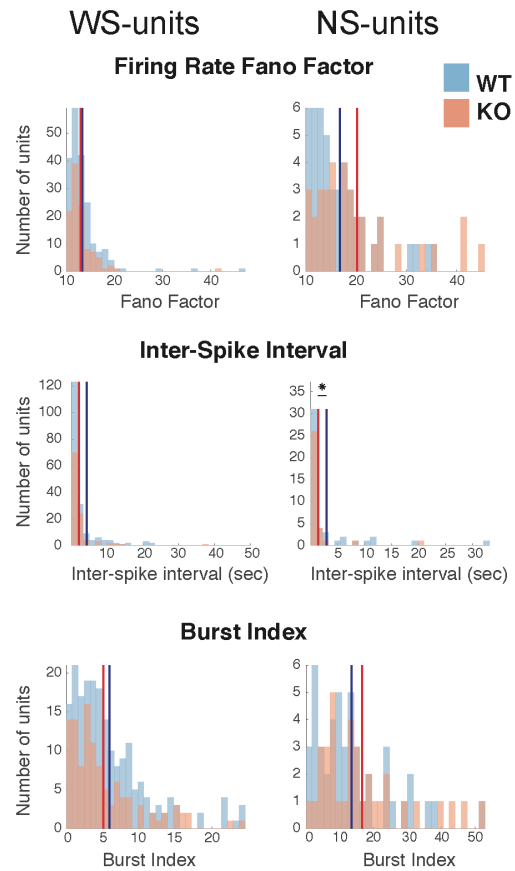

**Supplementary Fig. 5 | Comparison of locomotion features and spiking characteristics during both locomotion and immobility between WT and KO single units.** Related to Figure 4. **a**, Frequency of motion bouts per animal. **b**, Mean duration per bout. **c**, Percentage time spent in locomotion. **d**, Mean velocity per motion bout. **e**, Mean distance traveled per bout (velocity integral). **f**, Mean velocity per bout during motion initiation and termination. All differences are non-significant ( $P > 0.05$ ; Two-sample t-test, except for panel F, where Wilcoxon test was applied for timesteps where distributions were non-normal by Lilliefors goodness of fit test). **g**, Left column: Wide-spiking units. Right: Narrow-spiking units. Each panel depicts distributions over all WT (blue) and KO (red) unit spiking during locomotion. Lines: Means of corresponding distributions. From top: Firing rate Fano factors (spiking variability), inter-spike intervals and burst indexes. Asterisks:  $P < 0.05$ , Wilcoxon test, Bonferroni corrected over the two cell types for each measure). Comparing median values yielded similar results (not shown). **h**, Same as **g** for immobility segments.

**Supplementary Fig. 6**  
**Phase modulation during locomotion**

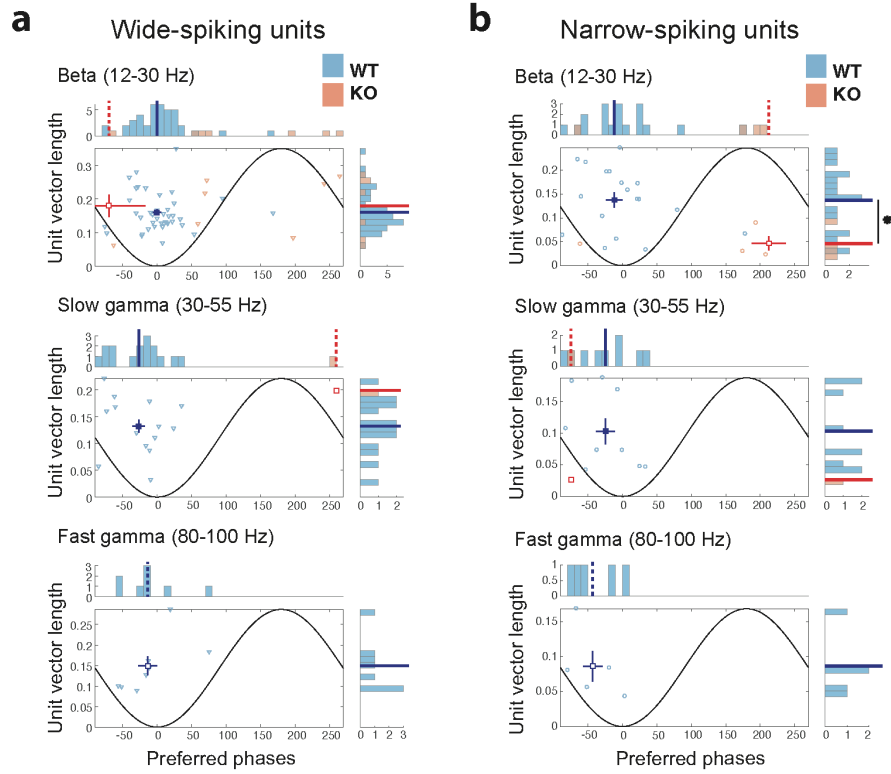

**Phase modulation during immobility**

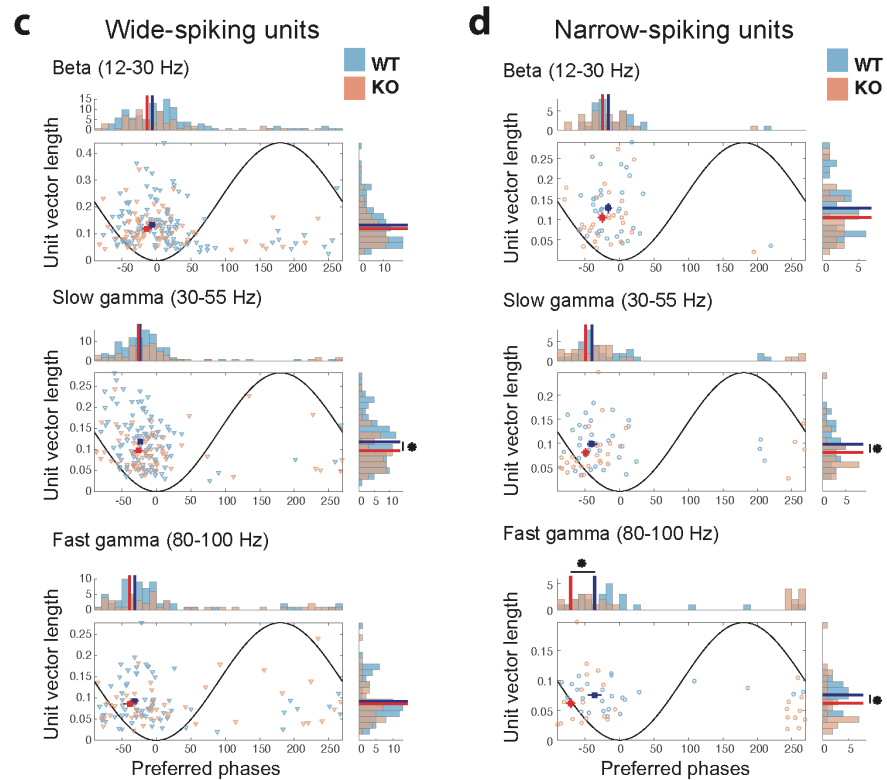

**Supplemental Figure 6 | Phase-locking strength and preferred phases of WS and NS units for higher frequency oscillations during locomotion and immobility.** Related to Figure 5. **a-b.** Distributions and corresponding histograms of strength of phase-locking (mean vector length) versus preferred phases of pooled WS units (a) and NS units (b) from WT (blue) and KO mice (red). Plotted similarly to Figure 5c. Dashed lines and open rectangles indicate phase means of distributions that are not significantly non-uniform ( $P > 0.05$ ; Rayleigh test for non-uniformity). **c-d.** Same as Figure 5d for all segments of immobility. Both WS and NS units from KO animals exhibit an overall weaker phase locking than those of WT animals (significant mostly in NS units and particularly in higher frequencies).

# Supplementary Fig. 7

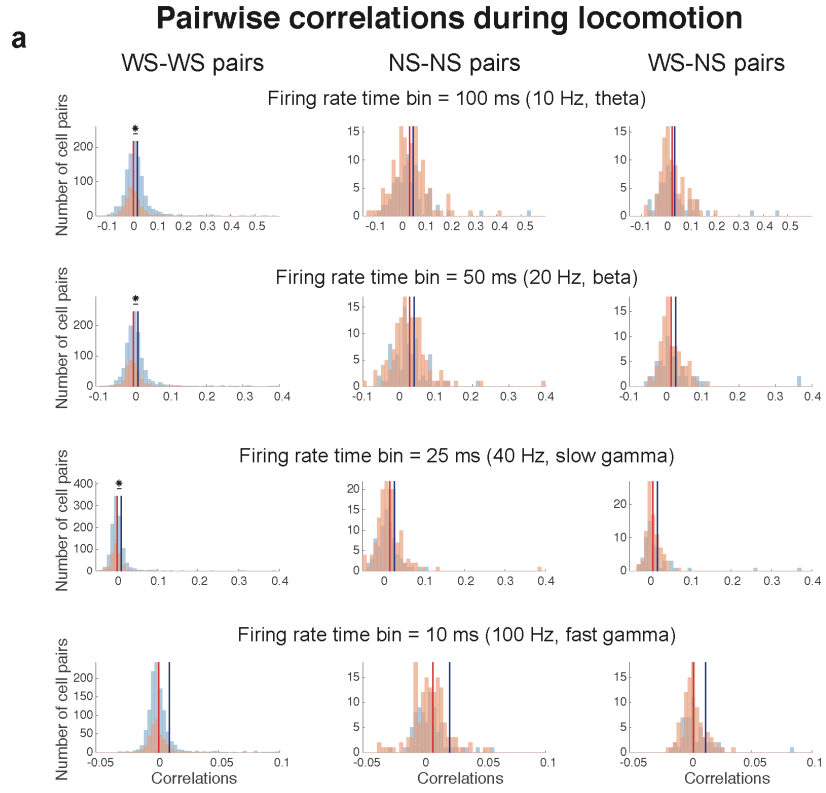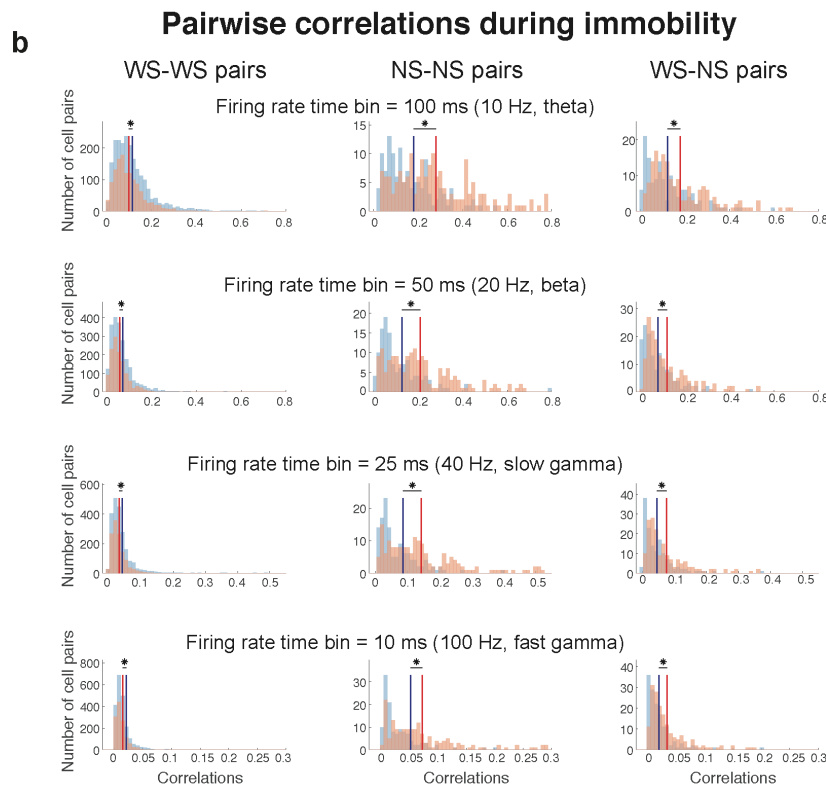



**Supplemental Figure 7 | Comparison of firing rate correlations between pairs of WT and KO single units during locomotion and immobility.** Related to Figure 5. **a**, Firing rate correlations between pairs of wide-spiking units (left), narrow-spiking units (middle) and wide-narrow spiking unit pairs (right) plotted similarly to Figure 5e. From top: Firing rates per unit pair, computed for locomotion segments over non-overlapping time bins of length: 100ms, 50ms, 25ms, 10ms. Only units with >200 spikes during all motion segments were included. Asterisks:  $P < 0.05$ , Wilcoxon test, Bonferroni corrected over the 3 unit-type combinations. **b**, Same as **a** for immobility segments.

## Supplementary Table 2

### Mean number of cells included in phase modulation analysis during locomotion

| Frequency                          | <u>Wide-spiking units</u> |            |                       | <u>Narrow-spiking units</u> |            |                       |
|------------------------------------|---------------------------|------------|-----------------------|-----------------------------|------------|-----------------------|
|                                    | WT                        | KO         | P-value               | WT                          | KO         | P-value               |
| <b>1 – 4 Hz<br/>(Delta)</b>        | 10.87 ± 10.19             | 6 ± 4.95   | 0.274<br>(Wilc. test) | 3.37 ± 2.82                 | 5.8 ± 4.97 | 0.292 (t-test)        |
| <b>5 – 11 Hz<br/>(Theta)</b>       | 7.25 ± 7.78               | 3 ± 2.83   | 0.192<br>(Wilc. test) | 2.75 ± 2.87                 | 4.2 ± 3.11 | 0.424<br>(Wilc. test) |
| <b>12 – 30 Hz<br/>(Beta)</b>       | 5 ± 8.25                  | 1.4 ± 2.07 | 0.926 (t-test)        | 2.25 ± 2.25                 | 0.8 ± 1.30 | 0.170<br>(Wilc. test) |
| <b>30 – 55 Hz<br/>(Slow gamma)</b> | 2 ± 4.57                  | 0.2 ± 0.45 | 0.718 (t-test)        | 1.12 ± 1.55                 | 0.2 ± 0.45 | 0.391 (t-test)        |
| <b>80 – 100<br/>(Fast gamma)</b>   | 1 ± 2.45                  | 0 ± 0      | 0.718 (t-test)        | 0.62 ± 1.06                 | 0 ± 0      | 0.391 (t-test)        |

### Mean number of cells included in phase modulation analysis during immobility

| Frequency                          | <u>Wide-spiking units</u> |              |                       | <u>Narrow-spiking units</u> |            |                       |
|------------------------------------|---------------------------|--------------|-----------------------|-----------------------------|------------|-----------------------|
|                                    | WT                        | KO           | P-value               | WT                          | KO         | P-value               |
| <b>1 – 4 Hz<br/>(Delta)</b>        | 18.62 ± 3.33              | 18 ± 9.03    | 0.340 (t-test)        | 4.75 ± 2.81                 | 6 ± 5.79   | 0.670<br>(Wilc. test) |
| <b>5 – 11 Hz<br/>(Theta)</b>       | 17.12 ± 2.75              | 16.6 ± 9.127 | 0.603 (t-test)        | 4.5 ± 2.51                  | 5.8 ± 5.40 | 0.635<br>(Wilc. test) |
| <b>12 – 30 Hz<br/>(Beta)</b>       | 13.87 ± 7.38              | 13 ± 6.78    | 0.832<br>(Wilc. test) | 4.37 ± 2.44                 | 5.6 ± 5.59 | 0.663<br>(Wilc. test) |
| <b>30 – 55 Hz<br/>(Slow gamma)</b> | 12.62 ± 9.04              | 12.6 ± 6.98  | 0.996<br>(Wilc. test) | 4.37 ± 2.56                 | 6.2 ± 5.49 | 0.516<br>(Wilc. test) |
| <b>80 – 100<br/>(Fast gamma)</b>   | 8.37 ± 7.03               | 8.8 ± 3.70   | 0.381 (t-test)        | 3.12 ± 1.96                 | 5.2 ± 5.26 | 0.439<br>(Wilc. test) |

### Mean number of cells included in correlation analysis

|                   | <u>Wide-spiking units</u> |             |                       | <u>Narrow-spiking units</u> |            |                       |
|-------------------|---------------------------|-------------|-----------------------|-----------------------------|------------|-----------------------|
|                   | WT                        | KO          | P-value               | WT                          | KO         | P-value               |
| <b>Locomotion</b> | 10.75 ± 11.44             | 5.8 ± 6.26  | 0.336<br>(Wilc. test) | 3 ± 2.83                    | 4.4 ± 4.72 | 0.572<br>(Wilc. test) |
| <b>Immobility</b> | 20.12 ± 7                 | 19.2 ± 9.88 | 0.923 (t-test)        | 4.5 ± 2.45                  | 5.6 ± 5.41 | 0.686<br>(Wilc. test) |

**Table S2: Mean number of cells included in phase modulation analysis and correlation analysis.** Related to Figure 5.
